# Supplementary material for: CinNapht AIE(E)gens for selective imaging of lipid droplets
Source: Royal Society of Chemistry journal article supplement (doi:10.1039/d4ob00247d), 2024-01-01
Supplement: d4ob00247d1.pdf [file d4ob00247d1.pdf]

# CinNapht AIE(E)Gens for selective imaging of lipid droplets

Eléonore Tacke,<sup>a</sup> Minh-Duc Hoang,<sup>a</sup> Lilian Estaque,<sup>b</sup> Philippe Durand,<sup>a</sup> Gregory Pieters<sup>b</sup> and Arnaud Chevalier\*<sup>a</sup>

*a. Université Paris-Saclay, CNRS, Institut de Chimie des Substances Naturelles, UPR 2301, 91198, Gif-sur-Yvette, France.*

*b. Département Médicaments et Technologies pour la Santé (DMTS), SCBM, Université Paris-Saclay, CEA, INRAE, 91191 Gif-sur-Yvette, France.*

*E-mail: arnaud.chevalier@cnsr.fr*

## Supporting Information

|                                                                                      |    |
|--------------------------------------------------------------------------------------|----|
| I. Additional Figures.....                                                           | 3  |
| Fig S1: Absorbance, Emission and Excitation Spectra in CHCl <sub>3</sub> .....       | 3  |
| Fig S2. Extinction coefficient ( $\epsilon$ ) calculation in CHCl <sub>3</sub> ..... | 4  |
| Fig S3. Emission spectra in solid state .....                                        | 5  |
| Fig S4. Absolute fluorescence quantum yield measurement.....                         | 6  |
| Fig S5. Absorbance, Emission and Excitation Spectra in Canola Oil .....              | 6  |
| Fig S6. Photophysical properties of CinNapht 3 in CHCl <sub>3</sub> .....            | 7  |
| II. Experimental Section.....                                                        | 9  |
| Synthesis protocols.....                                                             | 10 |
| General procedure : .....                                                            | 10 |
| CinNapht Carbazole (2b) .....                                                        | 11 |
| CinNapht Carbazole-ditBu (2c) .....                                                  | 12 |
| CinNapht Phenothiazine (2d) .....                                                    | 12 |
| CinNapht Phenoxazine (2e) .....                                                      | 13 |
| CinNapht Dimethylacridine (2f).....                                                  | 13 |

|                                                                                                             |    |
|-------------------------------------------------------------------------------------------------------------|----|
| Synthetic route to unsubstituted CinNapht 3 .....                                                           | 14 |
| 6-amino-5-(2-aminophenyl)-2-butyl-1H-benzo[de]isoquinoline-1,3(2H)-dione (3a).....                          | 14 |
| 11-butyl-10H-benzo[c]isoquinolino[4,5-gh]cinnoline-10,12(11H)-dione (3) .....                               | 14 |
| NMR and MS Spectra .....                                                                                    | 16 |
| Compound 2a: .....                                                                                          | 16 |
| Compound 2c: .....                                                                                          | 18 |
| Compound 2d: .....                                                                                          | 20 |
| Compound 2e: .....                                                                                          | 22 |
| Compound 2f: .....                                                                                          | 24 |
| Compound 3a .....                                                                                           | 26 |
| Compound 3: .....                                                                                           | 28 |
| Theoretical calculations:.....                                                                              | 30 |
| Cartesian coordinates of the optimized geometrie of 2b' (in Å): .....                                       | 30 |
| FMOs distributions for 2b' .....                                                                            | 32 |
| Simulated UV data (excitation number, energy, wavelength, oscilator strenghs and transition involved) ..... | 32 |
| Simulated UV spectra of 2b' .....                                                                           | 33 |

## I. Additional Figures

**Fig S1: Absorbance, Emission and Excitation Spectra in CHCl<sub>3</sub>**

Spectra were recorded at 25°C, at 10<sup>-5</sup> M in solution in CHCl<sub>3</sub>. Emission spectrum was recorded using an excitation at 470 nm for Cinnapht **2b**, **2c**, **2d** and 490 nm for CinNapht **2e**, **2f**. Spectra of compound **2a** can be found in our previous study<sup>1</sup>

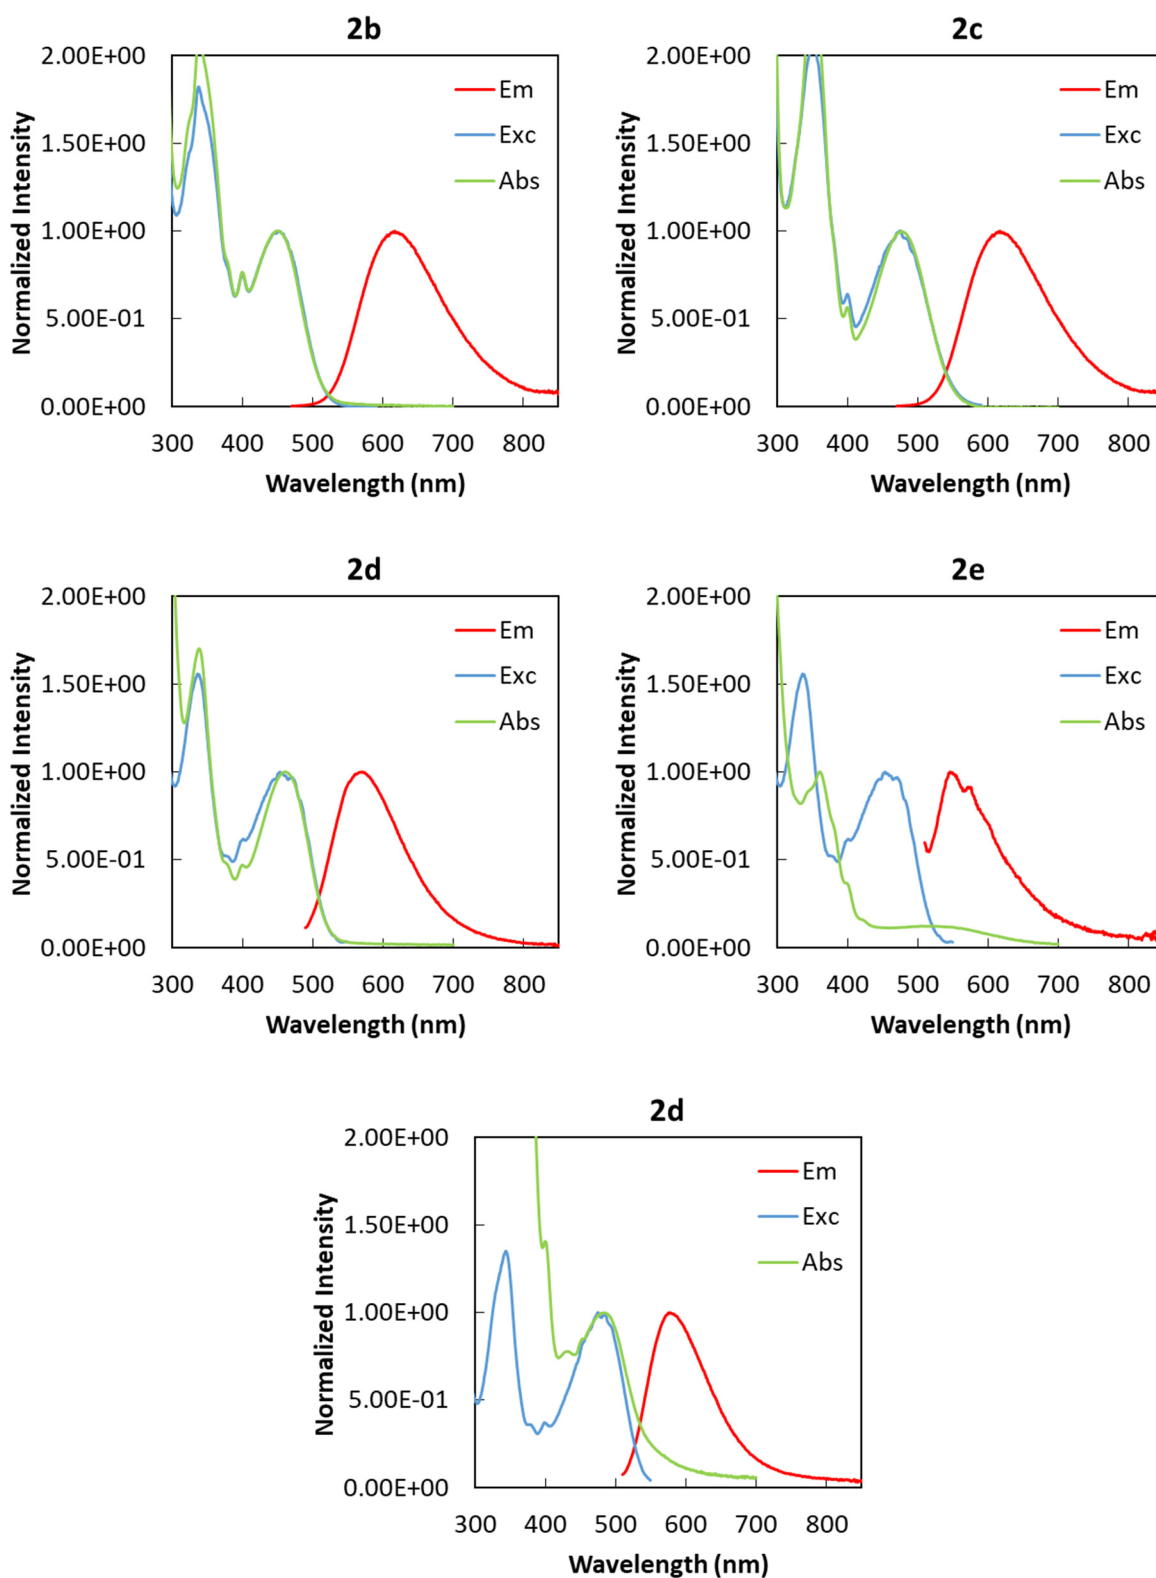

**Fig S2. Extinction coefficient ( $\epsilon$ ) calculation in  $\text{CHCl}_3$**

Absorbance spectra were recorded at  $25^\circ\text{C}$  in  $\text{CHCl}_3$ .

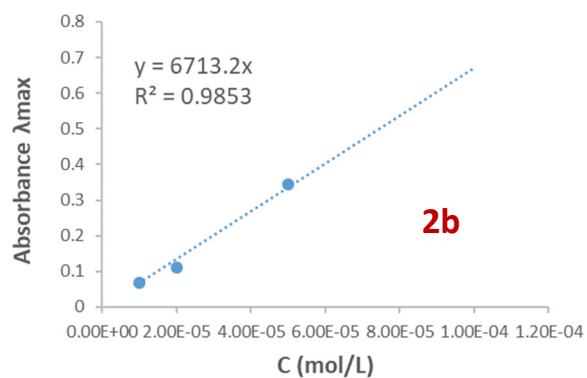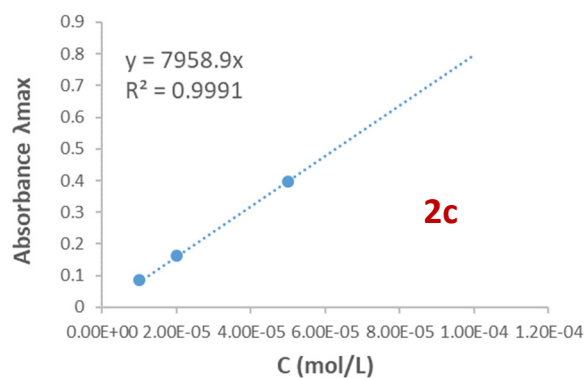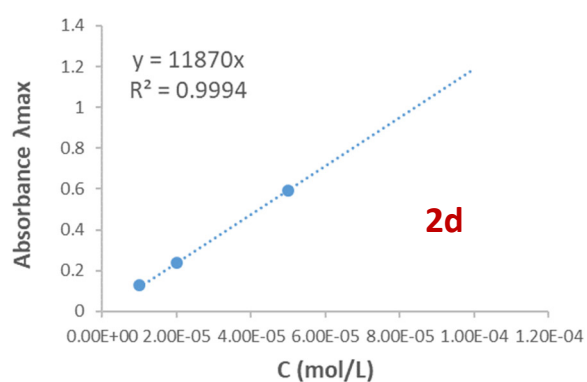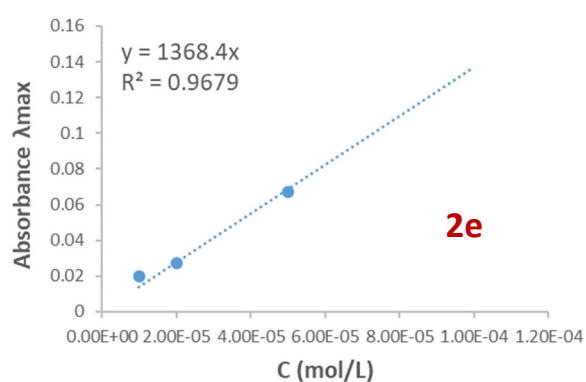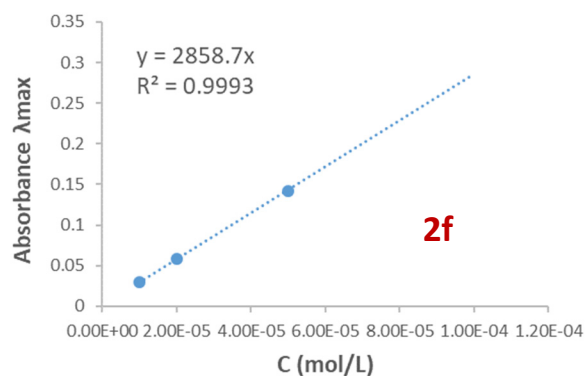

### Fig S3. Emission spectra in solid state

Spectra were recorded at 25°C with  $\lambda_{Exc} = 400$  nm for CinNaphts **2b** and **2c**,  $\lambda_{Exc} = 470$  nm for CinNaphts **2a** and **2d**,  $\lambda_{Exc} = 490$  nm for CinNaphts **2f**

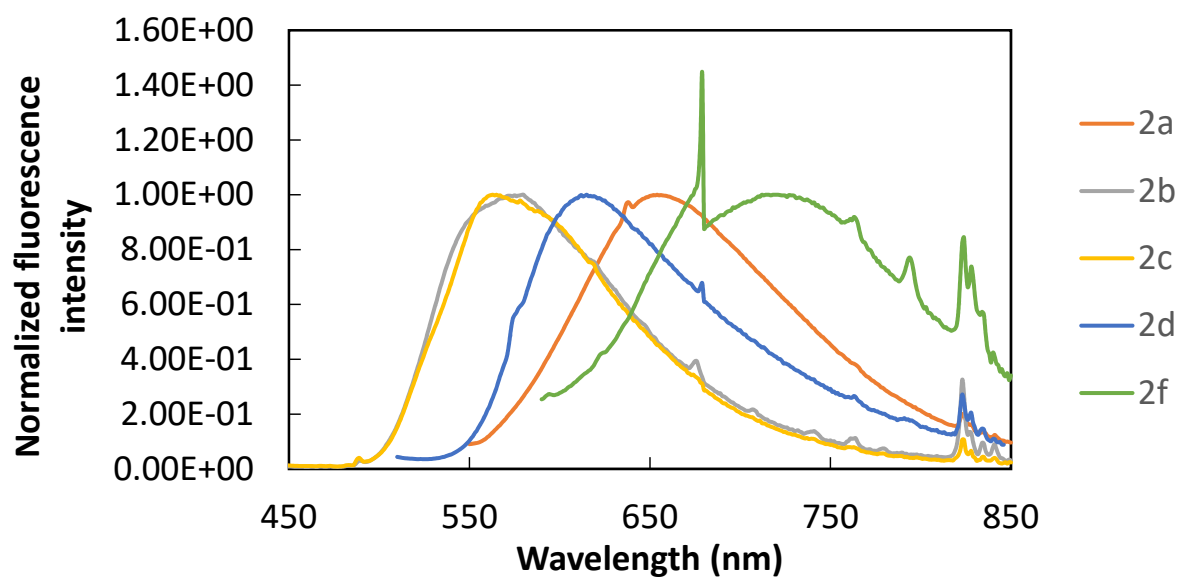

### Fig S4. Absolute fluorescence quantum yield measurement

Spectra (in powder state) were recorded at room temperature (approximately 20 °C) using the excitation wavelengths determined by the  $\lambda_{Abs}$  (max) value in chloroform solution. The reference emission spectra (without compound) are represented by red lines, while the emission spectra of the powder are depicted by black lines

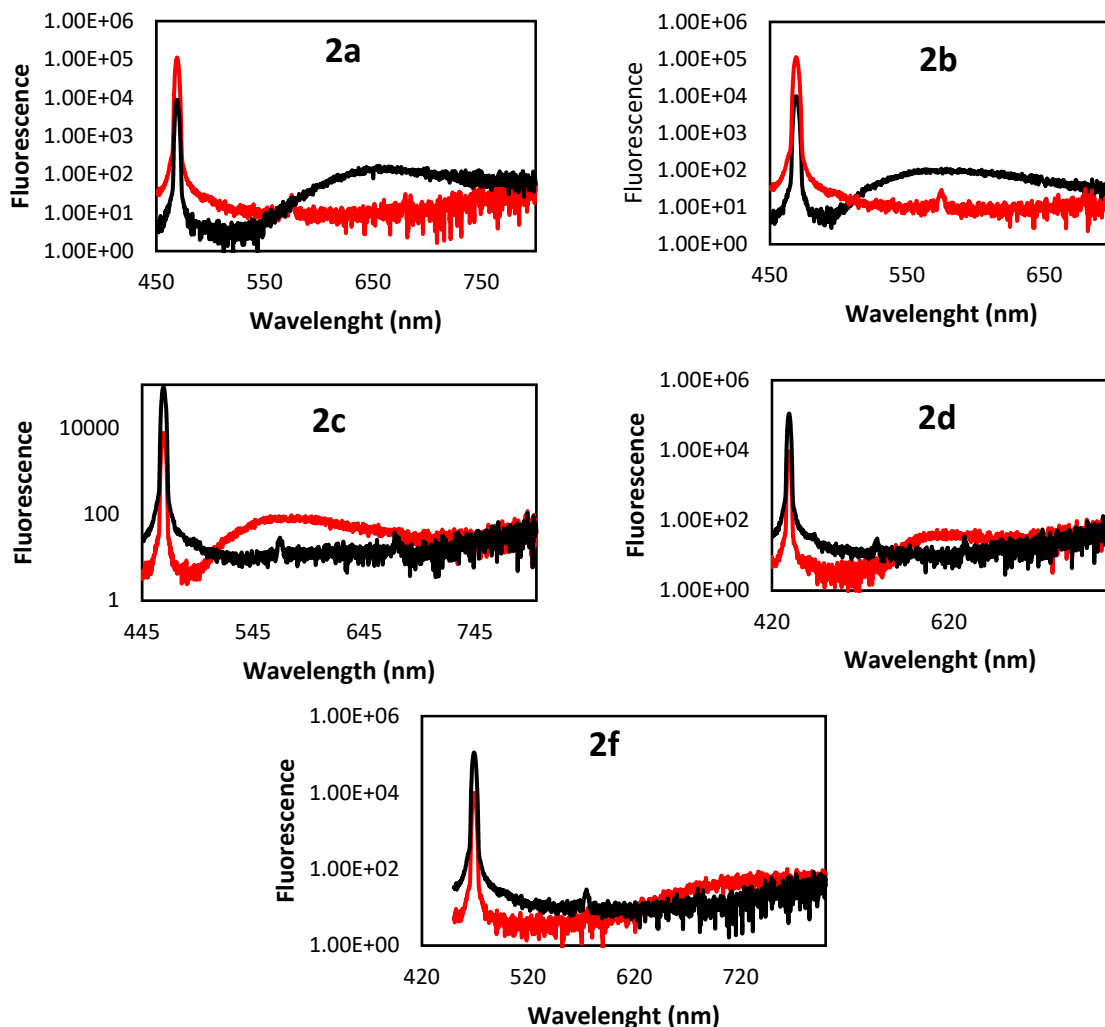

### Fig S5. Absorbance, Emission and Excitation Spectra in Canola Oil

Spectra were recorded at 25°C in Canola Oil. Emission spectrum was recorded using an excitation at 470 nm. Excitation spectrum was recorded using an emission at 600 nm.

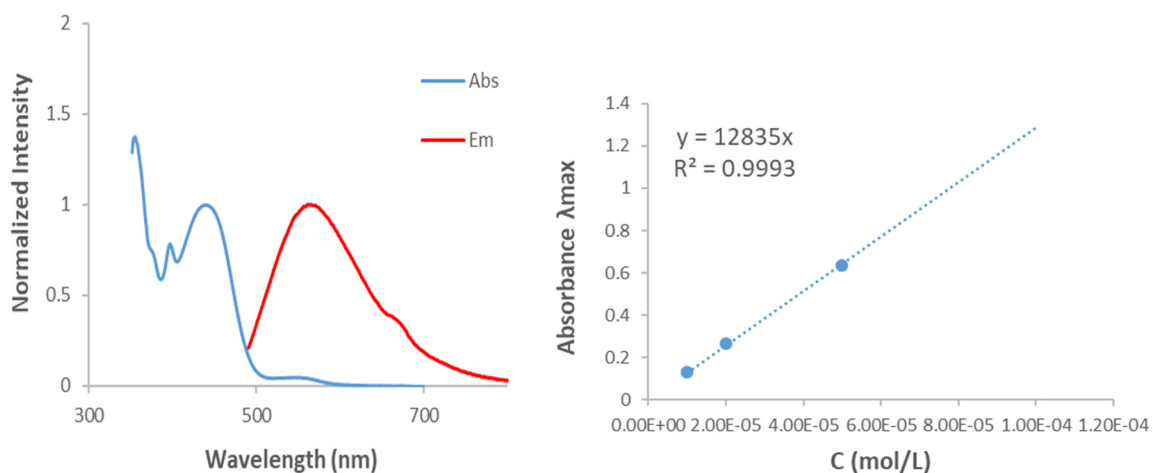

**Fig S6. Photophysical properties of CinNapht 3 in  $\text{CHCl}_3$**

Spectra were recorded at  $25^\circ\text{C}$  at  $10^{-5}\text{M}$  in solution in  $\text{CHCl}_3$ . Emission spectrum was recorded using an excitation at 360 nm showing the complete absence of emission. Emission spectra of CinNapht 3 was recorded at  $25^\circ\text{C}$  for an excitation at 360 nm.

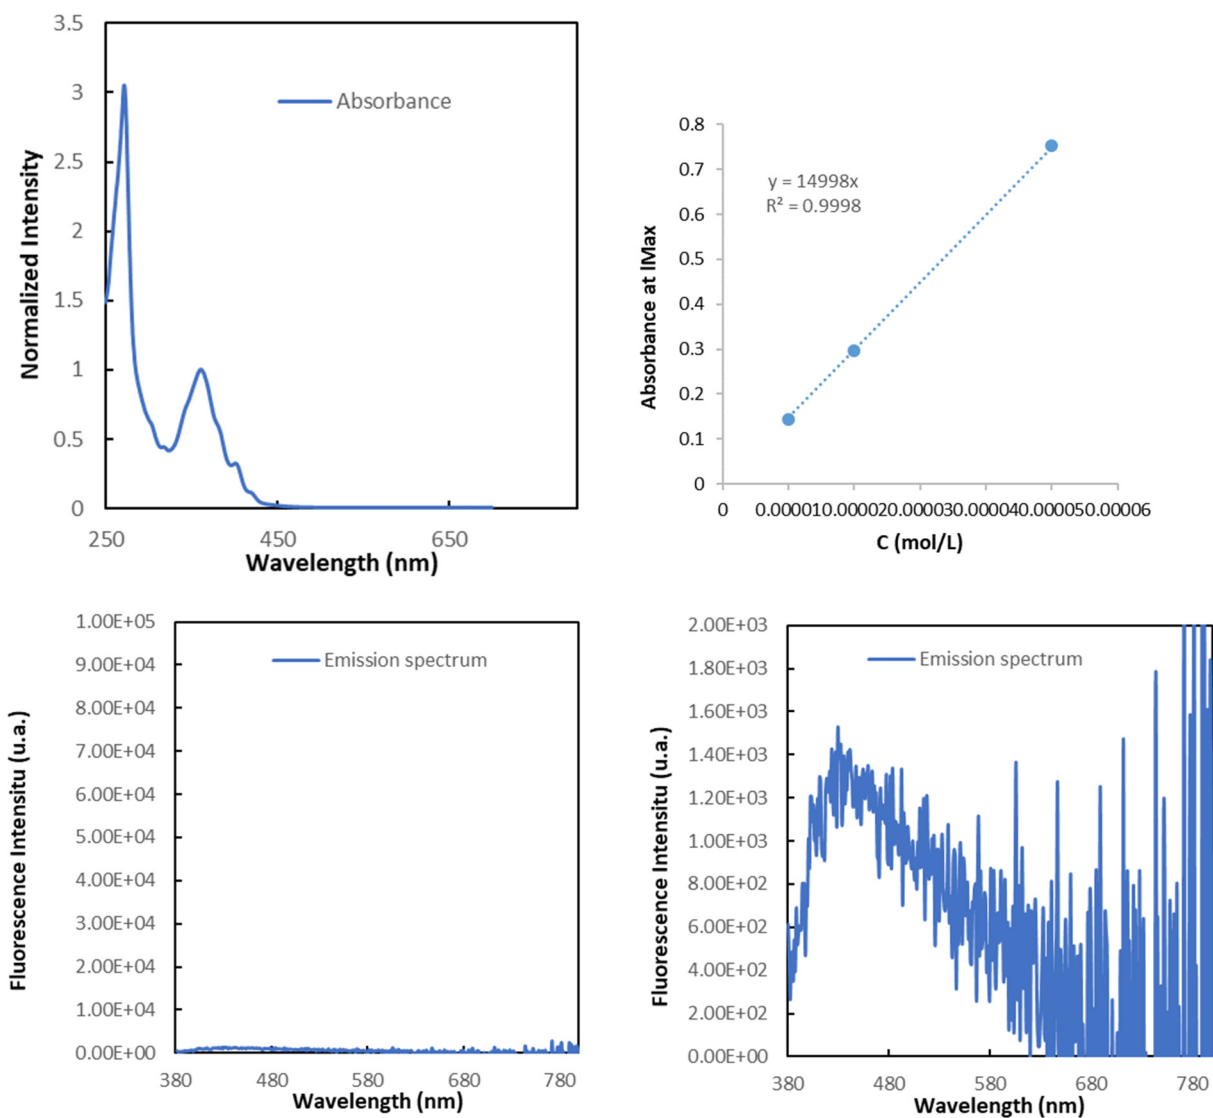





## II. Experimental Section

### Experimental section

#### Abbreviations

The following abbreviations are used throughout the text of the ESI file. Abs: Absorption; aq: aqueous; Ar, argon; CHCl<sub>3</sub>: chloroform; DCM: dichloromethane; DMF: dimethylformamide; DMSO: dimethylsulfoxide; Em: emission; EtOH: ethanol; EtOAc: ethyl acetate; Exc: excitation; H<sub>2</sub>O: water; Hept: heptane; HRMS: High-Resolution Mass Spectrum; IR: infrared; MeOH: methanol; min: minutes; NMR: Nuclear Magnetic Resonance; PBS: phosphate buffered saline; MS: mass spectrometry; RT: room temperature; TLC: Thin Layer Chromatography; UV: ultraviolet; Vis: Visible.

#### General

Unless otherwise noted, all commercially available reagents and solvents were used without further purification. TLC were carried out on silica gel aluminum plates with F-254 indicator. The spots were directly visualized or through illumination with UV lamp ( $\lambda = 254/365$  nm). Flash-column chromatography purifications were performed on silica gel cartridges (50  $\mu$ m) from Interchim. Organic solvents for spectroscopy were purchased from Acros Organics, Carlo Ebra or Sigma Aldrich. Colza oil (mainly composed of unsaturated lipids ~93% from Lesieur, Asnières-sur-Seine, France).

#### Instruments and methods

Proton NMR (<sup>1</sup>H) spectra were recorded on a Bruker Advance 500 or 300 MHz and proton-decoupled carbon <sup>13</sup>C NMR spectra were recorded at 125 MHz. NMR experiments were carried out in deuterated solvents and chemical shifts are expressed in parts per million (ppm) from the residual signals of partially deuterated solvent summarized in 2010 by Fulmer et al.<sup>2</sup> The following abbreviations are used for the multiplicities: s: singlet; d: doublet; t: triplet; q: quadruplet; qt: quintuplet, sx: sextuplet; m: multiplet or overlap of non-equivalent resonance; br s: broad singlet; coupling constants (J) are reported in Hertz (Hz).

High resolution mass spectra were determined on an AEI MS-9 using electrospray ionization (ESI) and a time offlight (TOF) analyser. IR spectra were recorded with a PerkinElmer Spectrum BX FT-IR spectrometer directly from the substance via attenuated total reflectance (ATR-IR) and bond vibration frequencies are expressed in reciprocal centimeters (cm<sup>-1</sup>). HPLC-MS analyses were performed on an Alliance W2690 system (Waters, USA). UV-Visible absorption spectra were recorded on a Varian Cary 60 Spectrophotometer using a 10 mm path quartz cell. Emission spectra experiments were performed on an Edimburgh FS-5 spectrofluorimeter with a SC-20 module. A right angle configuration was used. The relative fluorescence quantum yields were determined using DCM (4-Dicyanomethylene)-2-methyl-6-(4-dimethylaminostyryl)-4H-pyran) as reference ( $\phi_{FL} = 0.43$  in EtOH).

#### Photophysical characterization

UV-Vis absorption measurements (scan mode) were conducted on a Cary UV 60 spectrophotometer (Varian) using rectangular 10 mm path length quartz cuvettes at 25°C. Fluorescence spectroscopic studies (scan mode) were performed with a spectrofluorimeter FS-5 (Edimburgh) at 25°C, with rectangular 10 mm path length quartz cuvettes from Hellma. The emission and excitation spectra were recorded with a diluted solution lower than 0.1 absorbance values. For the excitation and emission spectra the slits width were adjusted between 2-5 nm. All fluorescence spectra were corrected from

the lamp fluctuations and the apparatus response fluctuations. Fluorescence quantum yields were measured at 25°C, using three diluted solutions ( $A < 0.1$ ) and three diluted solution of DCM (QY = 0.43 in EtOH). For each QY measurements, slit width, excitation wavelength, scan rate, integration time and emission range were kept the same for the reference and the sample. The fluorescence quantum yield was determined thanks to the following formula:

$$\varphi_{FL}(x) = \varphi_{FL}(0) \frac{1 - 10^{-A_0} S_x}{1 - 10^{-A_x} S_0} \left(\frac{n_x}{n_0}\right)^2$$

Where  $S$  is the slope of the linear plot of the integrated fluorescence intensity in function of the absorbance value,  $n$  is the refractive index of the solvents (at 25°C) used in measurements, and the subscripts  $s$  and  $x$  represent standard and unknown, respectively.

### Cell culture and Confocal Microscopy

Cell lines were obtained from the American type Culture Collection (Rockville, USA) and were cultured according to the supplier's instructions. A549 cells were grown in RPMI 1640 containing 10 % FCS and 1% glutamine. Cells were maintained at 37°C in a humidified atmosphere containing 5% CO<sub>2</sub> and were split every 3 or 4 days at a time when enough confluence was obtained. An Ibidi®  $\mu$ -Slide 8 Well High Glass Bottom plate was seeded with 15 000 cells/well and then maintained at 37°C in a humidified atmosphere containing 5% CO<sub>2</sub> for 24h to 48h. After adequate confluence was obtained, the medium was removed and replaced by a solution of fluorophore at desired concentration in the appropriate medium, prepared from a stock solution of fluorophore in DMSO, final concentration in DMSO < 1.0% (please note that no solubility issue was noted). The cells were incubated for appropriate amount of time at 37°C in a humidified atmosphere containing 5% CO<sub>2</sub>. The fluorophore solution was then removed and the cells were washed twice with pre-warmed PBS (1X). Finally, RPMI medium was added before imaging.

Fluorescence images were acquired using a Leica SP8-X inverted confocal microscope with a 63x oil immersion objective (HC PL APO CS2 Leica). Excitation was performed using a white laser pulsed at 80 MHz set at the desired excitation wavelength or with a diode 405 nm (Leica, 50 mV). Detection was carried out by using PMT detector (Hamamatsu 6357) or GaAsP Hybrid (Hamamatsu) collecting photons over the appropriate emission wavelength window.

### Synthesis protocols

#### General procedure :

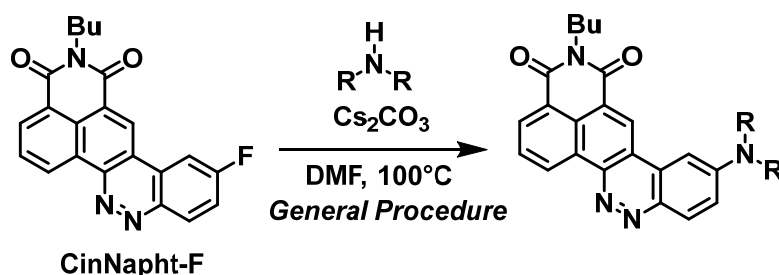

CinNapht-F (20.0 mg, 0.05 mmol, 1.00 eq), Cs<sub>2</sub>CO<sub>3</sub> (70.0 mg, 0.21 mmol, 4.00 eq) and the corresponding amine (0.11 mmol, 2.00 eq) were dissolved in DMF (0.50 mL, 0.1 M) and stirred at 100 °C overnight. After the reaction was completed, the mixture was cooled down to room temperature and diluted in DCM (50.0 mL). The mixture was washed with aqueous NaCl saturated solution (2 x 50.0 mL) and the combined organic layers were dried over MgSO<sub>4</sub>, filtered and concentrated *in vacuo*. The residue was purified by flash chromatography on silica gel or on preparative TLC plate using an appropriate eluting solvent mixture to afford the desired pure product.

### CinNapht Carbazole (2b)

Compound **2b** was prepared according to the general procedure using carbazole (18.0 mg, 0.11 mmol). The crude product was purified by flash chromatography on silica gel (DCM/AcOEt 99:1 v/v) to afford compound **2b** (22.0 mg, 79 %) as a yellow solid.

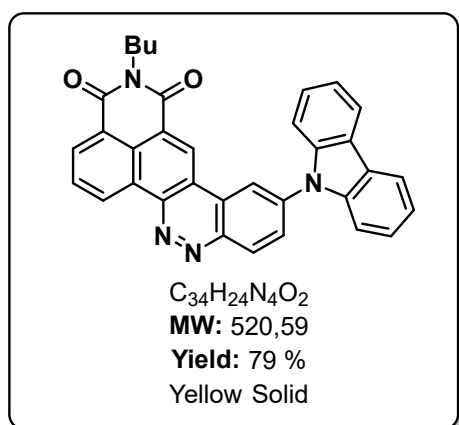

<sup>1</sup>H NMR (500 MHz, CDCl<sub>3</sub>) δ 10.07 (d, *J* = 8.2 Hz, 1H), 9.53 (s, 1H), 9.03 (d, *J* = 8.7 Hz, 1H), 8.96 (s, 1H), 8.79 (d, *J* = 7.3 Hz, 1H), 8.26 (d, *J* = 8.7 Hz, 1H), 8.15 (t, *J* = 7.8 Hz, 1H), 8.06 (d, *J* = 7.7 Hz, 2H), 7.59 (d, *J* = 8.2 Hz, 2H), 7.41 (t, *J* = 7.6 Hz, 2H), 7.30 (t, *J* = 7.4 Hz, 2H), 4.20 (t, *J* = 7.5 Hz, 2H), 1.80 – 1.71 (p, 2H), 1.52 – 1.40 (sx, *J* = 7.3 Hz, 2H), 0.99 (t, *J* = 7.3 Hz, 3H).

<sup>13</sup>C NMR (126 MHz, CDCl<sub>3</sub>) δ 164.0, 163.3, 146.1, 142.2, 142.1, 140.2 (2C), 133.9, 132.1, 130.9, 129.9, 129.6, 129.2, 127.8, 126.8 (2C), 125.6 (2C), 124.4, 123.0 (2C), 121.5 (2C), 120.8 (2C), 118.8, 118.5 (2C), 109.6 (2C), 40.8, 30.4, 20.5, 14.0.

R<sub>f</sub> (DCM/AcOEt 8:2) = 0.6

IR (neat): ν = 3676, 2959, 2916, 1735, 1699, 1657, 1612,

1491, 1444, 1407, 1394, 1380, 1334, 1230, 1066, 859, 787, 749, 724, 698, 663

ESI-HRMS calculated for C<sub>34</sub>H<sub>25</sub>N<sub>4</sub>O<sub>2</sub> [M+H]<sup>+</sup> 521.1959, found 521.1962

### CinNapht Carbazole-di*t*Bu (2c)

Compound **2c** was prepared according to the general procedure using 3,6-Di-*tert*-butylcarbazole (30.0 mg, 0.11 mmol). The crude product was purified by flash chromatography on silica gel (Hept/AcOEt 10:0 to 7:3 v/v) to afford compound **2c** (30.0 mg, 89 %) as a yellow solid.

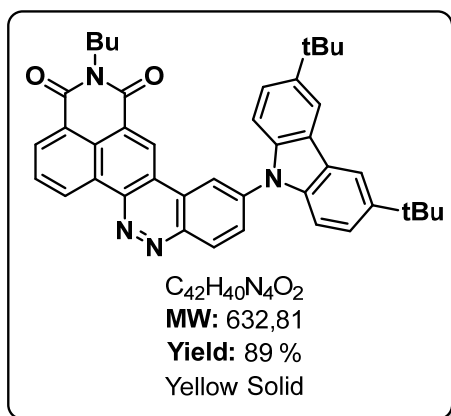

$^1H$  NMR (500 MHz,  $CDCl_3$ )  $\delta$  10.12 (d,  $J$  = 8.2 Hz, 1H), 9.60 (s, 1H), 9.07 (d,  $J$  = 8.8 Hz, 1H), 8.98 (d,  $J$  = 1.3 Hz, 1H), 8.82 (d,  $J$  = 7.2 Hz, 1H), 8.34 (dd,  $J$  = 8.8, 1.6 Hz, 1H), 8.21 (m, 2H), 8.17 (t,  $J$  = 7.9 Hz, 1H), 7.64 (d,  $J$  = 8.6 Hz, 2H), 7.56 (dd,  $J$  = 8.6, 1.4 Hz, 2H), 4.25 (t,  $J$  = 7.3 Hz, 2H), 1.84 – 1.70 (p,  $J$  = 7.4 Hz, 2H), 1.52 – 1.47 (m, 20H), 1.00 (t,  $J$  = 7.4 Hz, 3H).

$^{13}C$  NMR (75 MHz,  $CDCl_3$ )  $\delta$  164.0, 163.4, 146.0, 144.8 (2C), 142.7, 142.1, 138.5 (2C), 133.8, 132.0, 130.9 (2C), 129.9, 129.5, 128.9, 127.8, 125.8, 125.5, 124.6, 124.5 (2C), 123.0, 122.9, 118.8, 117.4, 116.9 (2C), 109.3 (2C), 40.8, 35.0 (2C), 32.1 (6C), 30.4, 20.5, 14.0

**Rf** (DCM/AcOEt 8:2) = 0.7

**IR** (neat):  $\nu$  = 3673, 2958, 2926, 2871, 1705, 1661, 1615, 1555, 1482, 1467, 1453, 1433, 1416, 1405, 1393, 1364, 1333, 1295, 1263, 1230, 1192, 1158, 1136, 1096, 1084, 1066, 938, 911, 879, 846, 809, 786, 752, 710, 691, 655

**ESI-HRMS** calculated for  $C_{42}H_{41}N_4O_2$   $[M+H]^+$  633.3230, found 633.3222

### CinNapht Phenothiazine (2d)

Compound **2d** was prepared according to the general procedure using phenothiazine (21.0 mg, 0.11 mmol). The crude product was purified by flash chromatography on silica gel (DCM/AcOEt 98:2 v/v) to afford compound **2d** (19.0 mg, 64 %) as an orange solid.

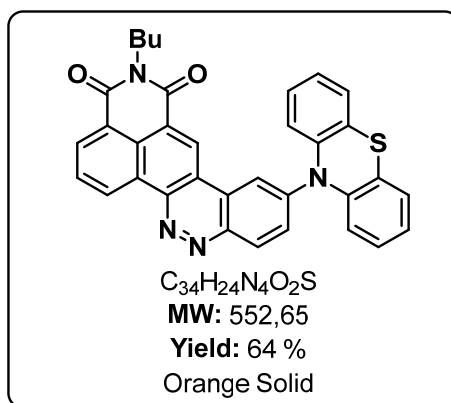

$^1H$  NMR (300 MHz,  $CDCl_3$ )  $\delta$  9.98 (dd,  $J$  = 8.3, 1.0 Hz, 1H), 9.23 (s, 1H), 8.73 (dd,  $J$  = 7.4, 1.0 Hz, 1H), 8.60 (d,  $J$  = 9.3 Hz, 1H), 8.12 (d,  $J$  = 2.5 Hz, 1H), 8.10 – 7.99 (m, 1H), 7.73 (dd,  $J$  = 9.3, 2.5 Hz, 1H), 7.68 – 7.56 (m, 4H), 7.52 (td,  $J$  = 7.7 Hz, 1.4 Hz, 2H), 7.36 (td,  $J$  = 7.6, 1.2 Hz, 2H), 4.30 – 4.09 (t,  $J$  = 7.5 Hz, 2H), 1.87 – 1.70 (m, 2H), 1.55 – 1.42 (sx,  $J$  = 7.4 Hz, 2H), 1.00 (t,  $J$  = 7.3 Hz, 3H).

$^{13}C$  NMR (75 MHz,  $CDCl_3$ )  $\delta$  164.1, 163.5, 149.1, 144.7 (2C), 142.0, 140.8, 134.7, 133.2, 131.6, 130.9, 129.8, 129.6 (2C), 129.0, 127.9 (2C), 127.5, 127.2 (2C), 127.0 (2C), 126.1, 124.0, 123.6, 122.7, 120.5 (2C), 118.6, 102.7, 40.7, 30.4, 20.6, 14.0

**Rf** (DCM/MeOH 95:5) = 0.6

**IR** (neat):  $\nu$  = 3775, 2967, 2916, 2850, 1710, 1663, 1616, 1481, 1387, 1256, 1229, 1103, 1066, 823, 783, 763, 740, 689

**ESI-HRMS** calculated for  $C_{34}H_{25}N_4O_2S$   $[M+H]^+$  553.1698, found 553.1708

### CinNapht Phenoxazine (2e)

Compound **2e** was prepared according to the general procedure using phenoxazine (20.0 mg, 0.11 mmol). The crude product was purified by preparative TLC (DCM/MeOH 9:1, v/v) to afford compound **2e** (20.0 mg, 68 %) as a dark purple solid.

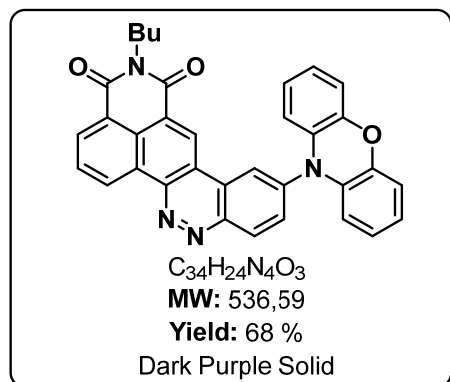

$^1H$  NMR (300 MHz,  $CDCl_3$ )  $\delta$  10.08 (dd,  $J = 8.3, 1.2$  Hz, 1H), 9.58 (s, 1H), 9.06 (d,  $J = 8.7$  Hz, 1H), 8.86 (d,  $J = 2.0$  Hz, 1H), 8.80 (dd,  $J = 7.4, 1.2$  Hz, 1H), 8.16 (dd,  $J = 8.3, 7.5$  Hz, 1H), 7.99 (dd,  $J = 8.8, 2.0$  Hz, 1H), 6.76 – 6.65 (m, 4H), 6.63 – 6.52 (m, 2H), 6.05 (dd,  $J = 7.6, 0.8$  Hz, 2H), 4.27 – 4.13 (m, 2H), 1.77 – 1.70 (m, 2H), 1.45 (sx, 7.3 Hz, 2H), 0.98 (t,  $J = 7.3$  Hz, 3H).

$^{13}C$  NMR (75 MHz,  $CDCl_3$ )  $\delta$  163.5, 162.8, 146.1, 144.0 (2C), 143.3, 141.5, 134.7 (2C), 133.0, 132.4, 131.6, 130.4, 129.5, 129.2, 127.4, 125.4, 125.2, 123.7, 123.1 (2C), 123.0, 122.6, 122.4 (2C), 118.4, 115.8 (2C), 113.5 (2C), 40.4, 29.9, 20.1, 13.5  
Rf (DCM/MeOH 95:5) = 0.7

IR (neat):  $\nu = 2958, 2926, 2872, 1704, 1659, 1602, 1555, 1486, 1463, 1434, 1417, 1403, 1383, 1363, 1334, 1292, 1273, 1229, 1191, 1150, 1132, 1090, 1066, 1044, 994, 936, 864, 844, 786, 742, 699, 667$

ESI-HRMS calculated for  $C_{34}H_{25}N_4O_3$   $[M+H]^+$  537.1927, found 537.1915

### CinNapht Dimethylacridine (2f)

Compound **2f** was prepared according to the general procedure using 9,10-Dihydro-9,9-dimethylacridine (22.0 mg, 0.11 mmol). The crude product was purified by flash chromatography on silica gel (Hept/ACoEt 1000 to 7:3 v/v) to afford compound **2f** (19.0 mg, 62 %) as a dark red solid.

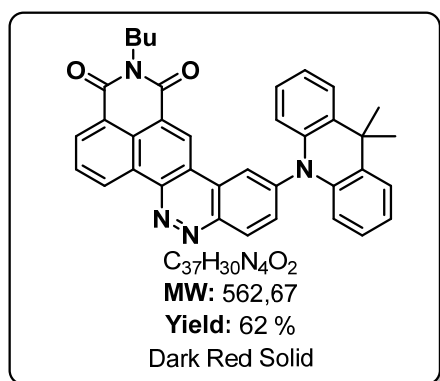

$^1H$  NMR (500 MHz,  $CDCl_3$ )  $\delta$  10.10 (d,  $J = 8.2$  Hz, 1H), 9.52 (s, 1H), 9.06 (d,  $J = 8.8$  Hz, 1H), 8.88 – 8.72 (m, 2H), 8.15 (t,  $J = 7.9$  Hz, 1H), 8.05 (dd,  $J = 8.8, 1.7$  Hz, 1H), 7.58 – 7.52 (m, 2H), 7.07 (dd,  $J = 5.8, 3.4$  Hz, 4H), 6.59 – 6.50 (m, 2H), 4.29 – 4.17 (t,  $J = 7.4$  Hz, 2H), 1.79 – 1.71 (m, 8H), 1.51 – 1.40 (sx,  $J = 7.4$  Hz, 2H), 0.99 (t,  $J = 7.4$  Hz, 3H).

$^{13}C$  NMR (126 MHz,  $CDCl_3$ )  $\delta$  164.0, 163.3, 146.3, 141.9, 140.6, 134.6, 133.2, 132.0, 131.7, 130.9, 129.9, 129.5, 127.8, 126.7 (2C), 125.9, 125.7 (2C), 125.6, 123.6, 123.0, 122.6 (2C), 120.7, 118.8, 116.3 (2C), 77.4, 77.2, 76.9, 40.8, 36.7, 30.7 (2C), 30.4, 20.5, 14.0

Rf (DCM/MeOH 95:5) = 0.6

IR (neat):  $\nu = 3661, 2960, 2921, 1704, 1661, 1618, 1599, 1554, 1474, 1448, 1416, 1404, 1383, 1363, 1330, 1266, 1229, 1190, 1131, 1107, 1088, 1076, 1048, 1066, 931, 892, 846, 786, 746, 702, 667$

ESI-HRMS calculated for  $C_{37}H_{31}N_4O_2$   $[M+H]^+$  563.2447, found 563.2468

## Synthetic route to unsubstituted CinNaph 3

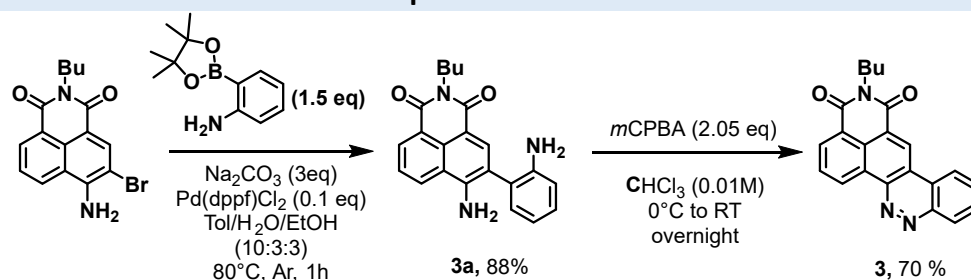

## 6-amino-5-(2-aminophenyl)-2-butyl-1H-benzo[de]isoquinoline-1,3(2H)-dione (**3a**)

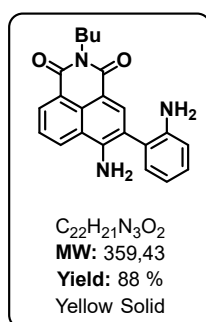

6-amino-5-bromo-2-butyl-1H-benzo[de]isoquinoline-1,3(2H)-dione (200 mg, 0.58 mmol, 1.00 eq), 2-(4,4,5,5-tetramethyl-1,3,2-dioxaborolan-2-yl)aniline (189 mg, 0.86 mmol, 1.50 eq) and  $\text{Na}_2\text{CO}_3$  (183 mg, 1.73 mmol, 3.00 eq) were dissolved in a mixture of  $\text{H}_2\text{O}$ , EtOH and toluene (2.6 mL, 3:3:10 v/v/v) in a Schlenk tube. The resulting mixture was desoxygenated with freeze-pump-thaw cycling before addition of  $\text{Pd(dppf)Cl}_2$  (42.0 mg, 0.058 mmol, 0.10 eq). The reaction was heated for 1h at  $80^\circ\text{C}$  with constant stirring under argon. After cooling to room temperature and evaporating the solvents, the crude mixture was purified by flash chromatography on silica gel (DCM/EtOAc 9:1 v/v) to afford compound **3a** (183 mg, 88%) as a yellow solid.

$^1\text{H NMR}$  (500 MHz,  $\text{CDCl}_3$ )  $\delta$  8.61 (dd,  $J = 7.3, 1.0$  Hz, 1H), 8.42 (s, 1H), 8.17 (dd,  $J = 8.4, 1.2$  Hz, 1H), 7.69 (dd,  $J = 8.4, 7.2$  Hz, 1H), 7.28 (m, 1.6 Hz, 1H), 7.18 (dd,  $J = 7.6, 1.6$  Hz, 1H), 6.90 (td,  $J = 7.5, 1.2$  Hz, 1H), 6.86 (dd,  $J = 8.1, 1.1$  Hz, 1H), 5.05 (s, 2H), 4.17 (m, 2H), 3.70 (s, 2H), 1.71 (m, 2H), 1.44 (sx,  $J = 7.5$  Hz, 2H), 0.97 (t,  $J = 7.4$  Hz, 3H).

$^{13}\text{C NMR}$  (126 MHz,  $\text{CDCl}_3$ )  $\delta$  164.4, 164.1, 146.5, 144.3, 135.9, 131.5, 131.4, 129.9, 129.4, 127.2, 125.5, 123.4, 122.4, 120.4, 119.4, 119.2, 116.1, 112.2, 40.2, 30.5, 20.6, 14.0.

**Rf** (DCM/EtOAc 8:2) = 0.5

**IR (neat):**  $\nu = 3460, 3354, 3233, 2958, 2827; 2858, 2246, 1680, 1627, 1611, 1583, 1518, 1493, 1464, 1450, 1429, 1392, 1363, 1337, 1289, 1263, 1226, 1206, 1158, 1137, 1075, 935, 907, 847, 777, 751, 730, 695 \text{ cm}^{-1}$

**ESI-HRMS** calculated for  $\text{C}_{22}\text{H}_{22}\text{N}_3\text{O}_2$   $[\text{M}+\text{H}]^+$  360.1712 found 360.1700

## 11-butyl-10H-benzo[c]isoquinolino[4,5-g]cinnoline-10,12(11H)-dione (**3**)

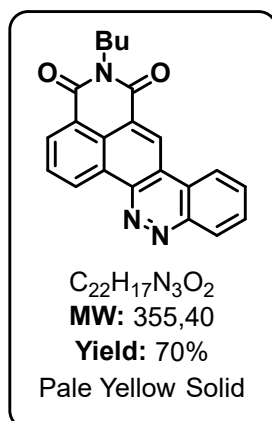

A solution of compound **3a** (150 mg, 0.42 mmol, 1.00 eq.) in  $\text{CHCl}_3$  was cooled in an ice bath to  $0^\circ\text{C}$ . *mCPBA* (148 mg, 0.86 mmol, 2.05 eq.) was added and the reacting mixture was kept at  $0^\circ\text{C}$  under stirring for 2h after what it was allowed to warm to room temperature. The mixture was then stirred under argon at room temperature overnight. After the reaction was completed (monitored by TLC) the mixture was quenched with a 10% aqueous  $\text{Na}_2\text{S}_2\text{O}_3$  solution. The phases were separated and the aqueous layer was extracted with DCM. The organic phase was then washed with a saturated solution of  $\text{NaHCO}_3$  (3 x 50.0 mL), dried over  $\text{MgSO}_4$  and concentrated under reduced pressure. The crude product was purified by flash chromatography on silica gel (DCM/EtOAc 95:5 v/v) to afford compound **3** (104 mg, 70%) as a pale yellow solid.

**<sup>1</sup>H NMR** (500 MHz, CDCl<sub>3</sub>) δ 10.09 (dd, *J* = 8.3, 1.2 Hz, 1H), 9.68 (s, 1H), 8.91 – 8.88 (m, 1H), 8.82 (m, 2H), 8.15 (m, 1H), 8.11 – 8.05 (m, 2H), 4.29 – 4.25 (m, 2H), 1.82 – 1.76 (m, 2H), 1.53 (sx, *J* = 7.5 Hz, 2H), 1.02 (t, *J* = 7.4 Hz, 3H).

**<sup>13</sup>C NMR** (126 MHz, CDCl<sub>3</sub>) δ 164.4, 164.1, 147.9, 142.1, 133.3, 132.1, 131.1, 130.9, 130.3, 129.8, 127.9, 126.2, 125.7, 123.1, 122.4, 121.6, 119.5, 117.7, 41.0, 30.6, 20.8, 14.3.

**Rf** (DCM/EtOAc 9:1) = 0.8

**IR (neat):** ν = 2957, 2930, 2871, 1702, 1659, 1618, 1600, 1498, 1449, 1434, 1410, 1380, 1335, 1264, 1229, 1156, 1127, 1091, 1080, 1066, 963, 937, 907, 857, 784, 766, 752, 735, 687 cm<sup>-1</sup>

**ESI-HRMS** calculated for C<sub>22</sub>H<sub>18</sub>N<sub>3</sub>O<sub>2</sub> [M+H]<sup>+</sup> 356.1399 found 356.1411

# NMR and MS Spectra

## Compound 2a:

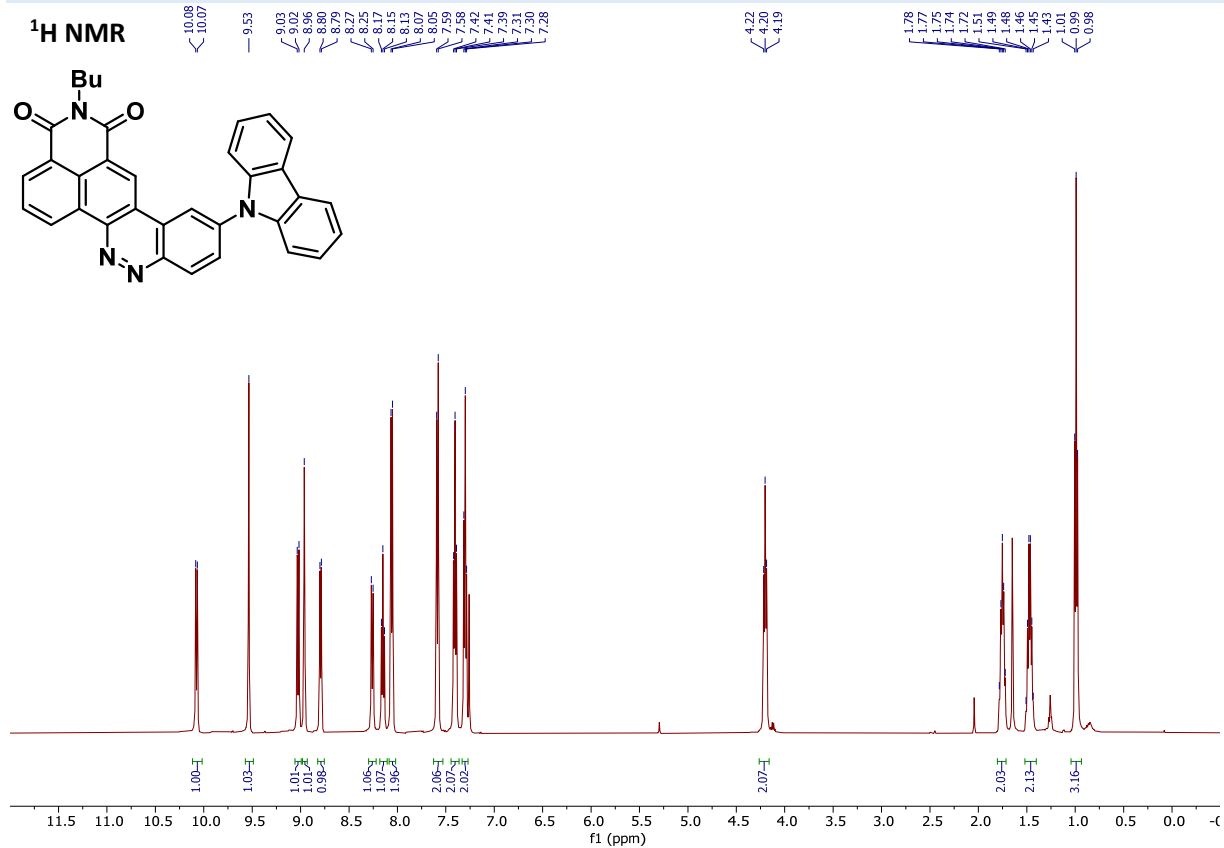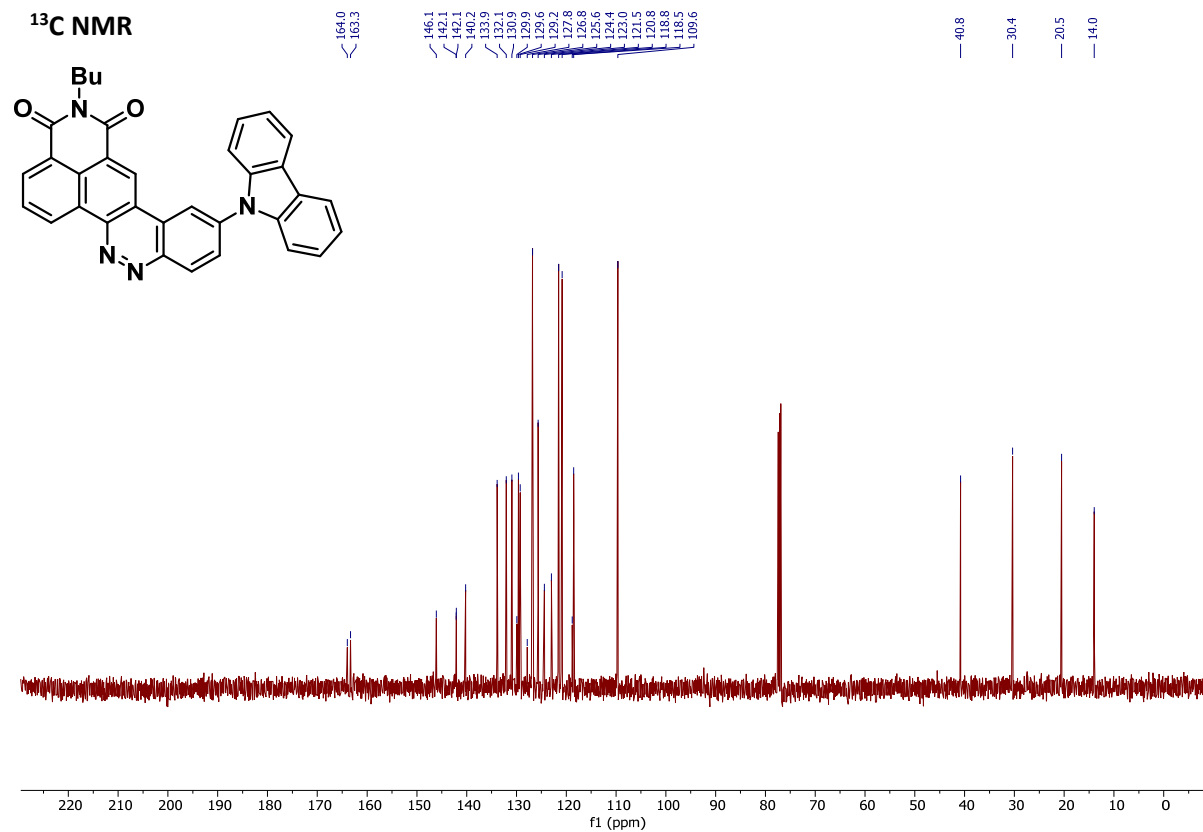

## HRMS



05-Aug-2022 6:7:1  
1: TQFMS ES+

LCTPremier

EQ75\_lake17-3:33 (0.845)

5.18e+002

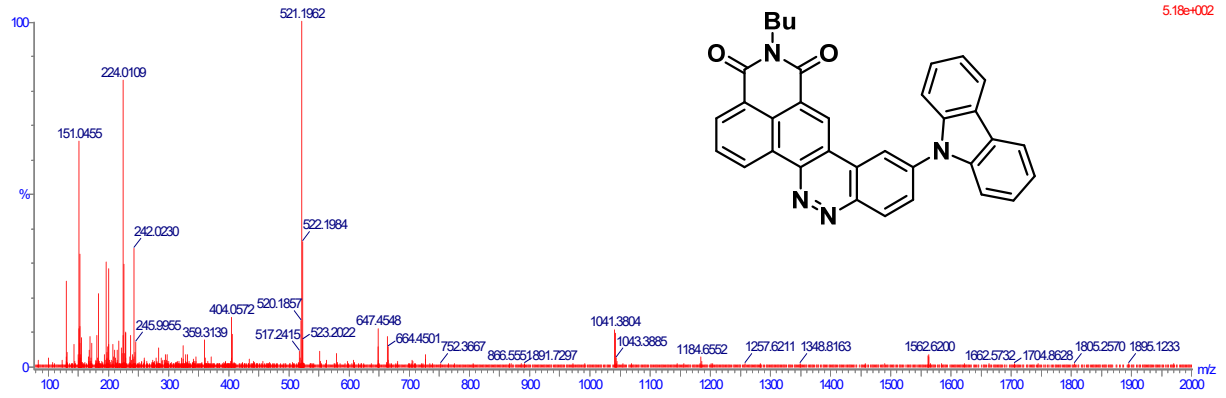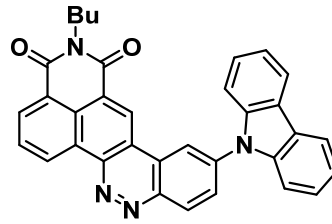

### Compound 2c:

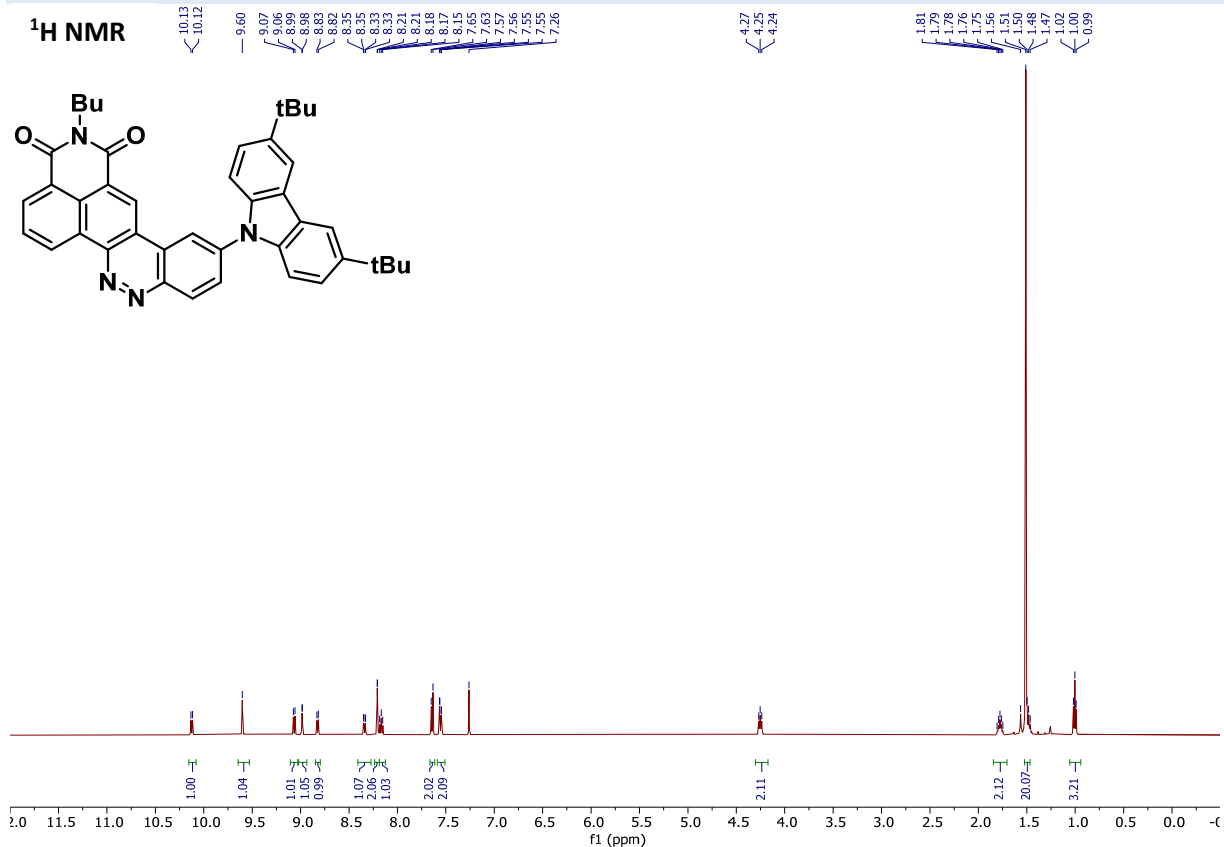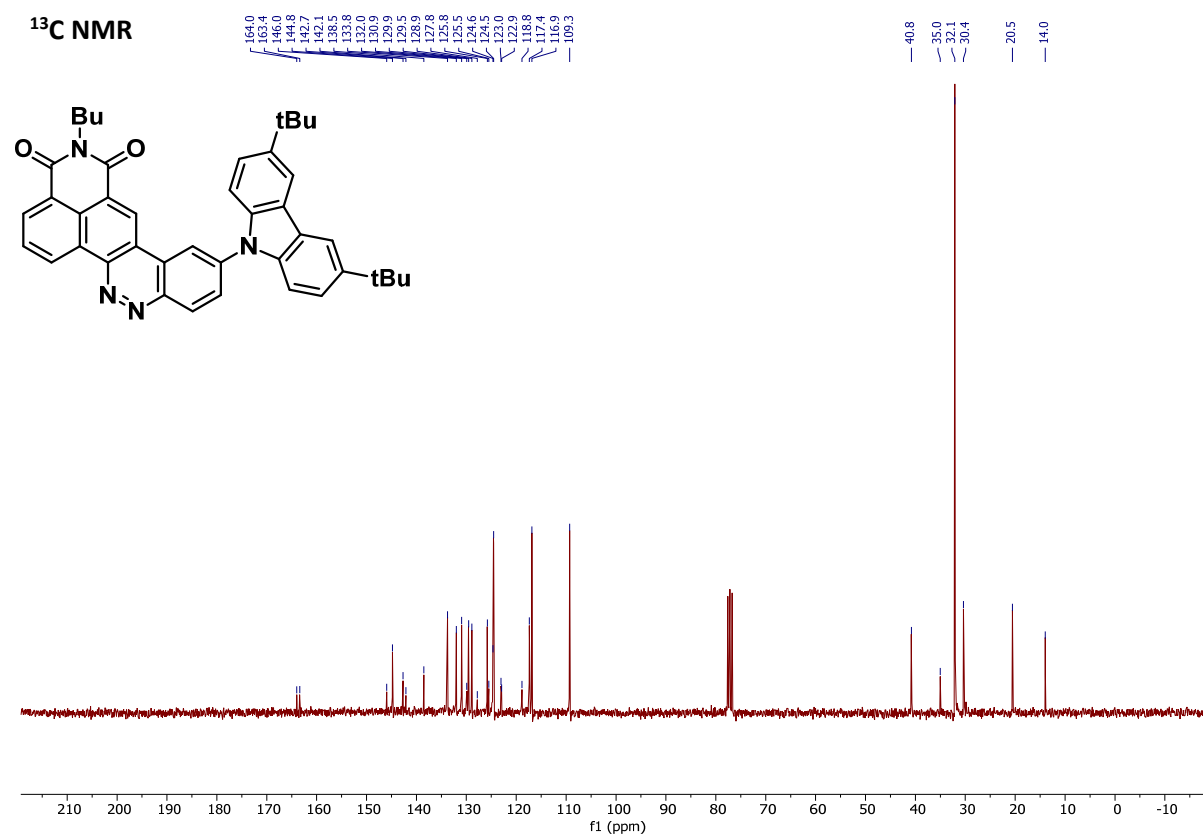

# HRMS

05-Aug-2022 6:2:9  
1: TCFMSES+

LCTPremier

EQ75\_tacke20-3-22 (0.581)

5.99e+002

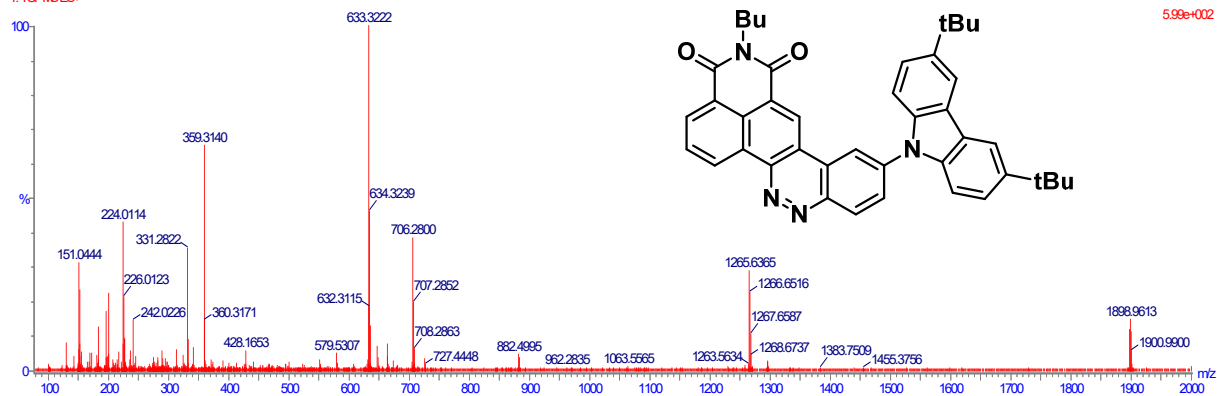

# Compound 2d:

## <sup>1</sup>H NMR

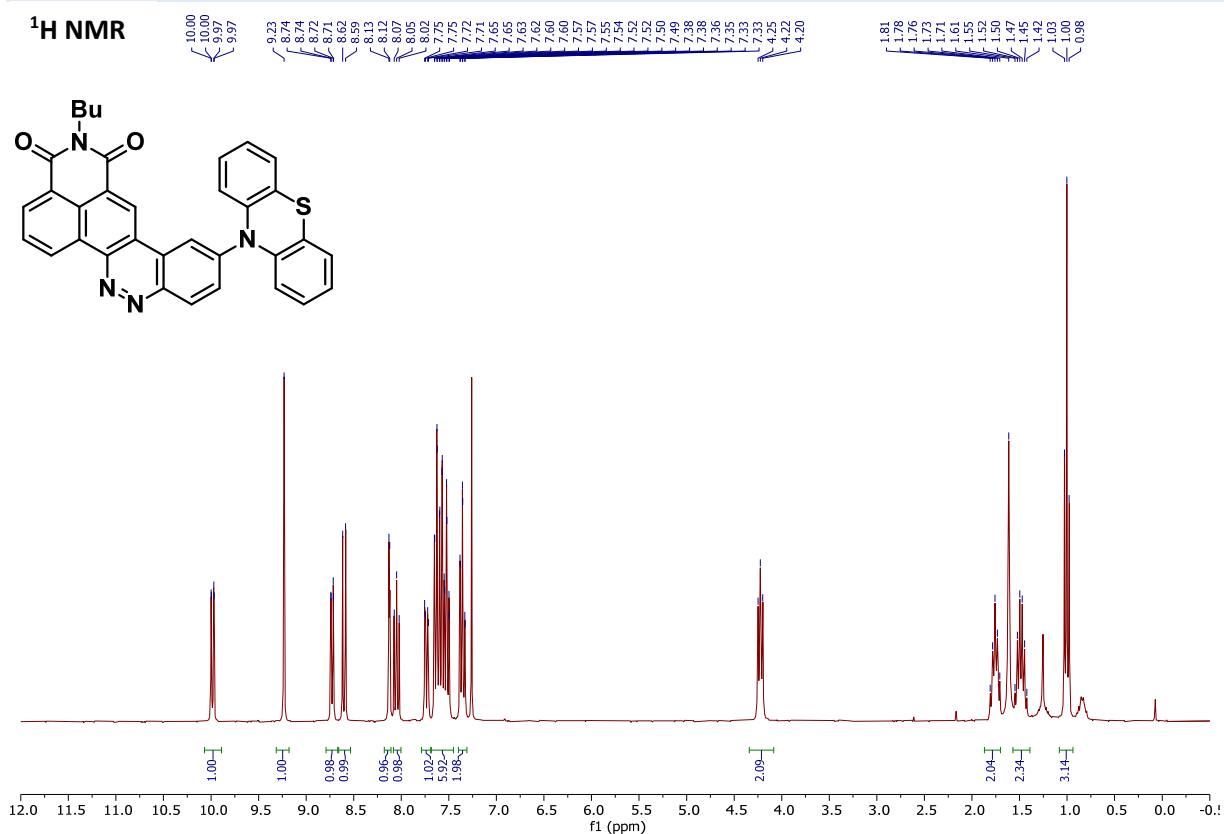

## <sup>13</sup>C NMR

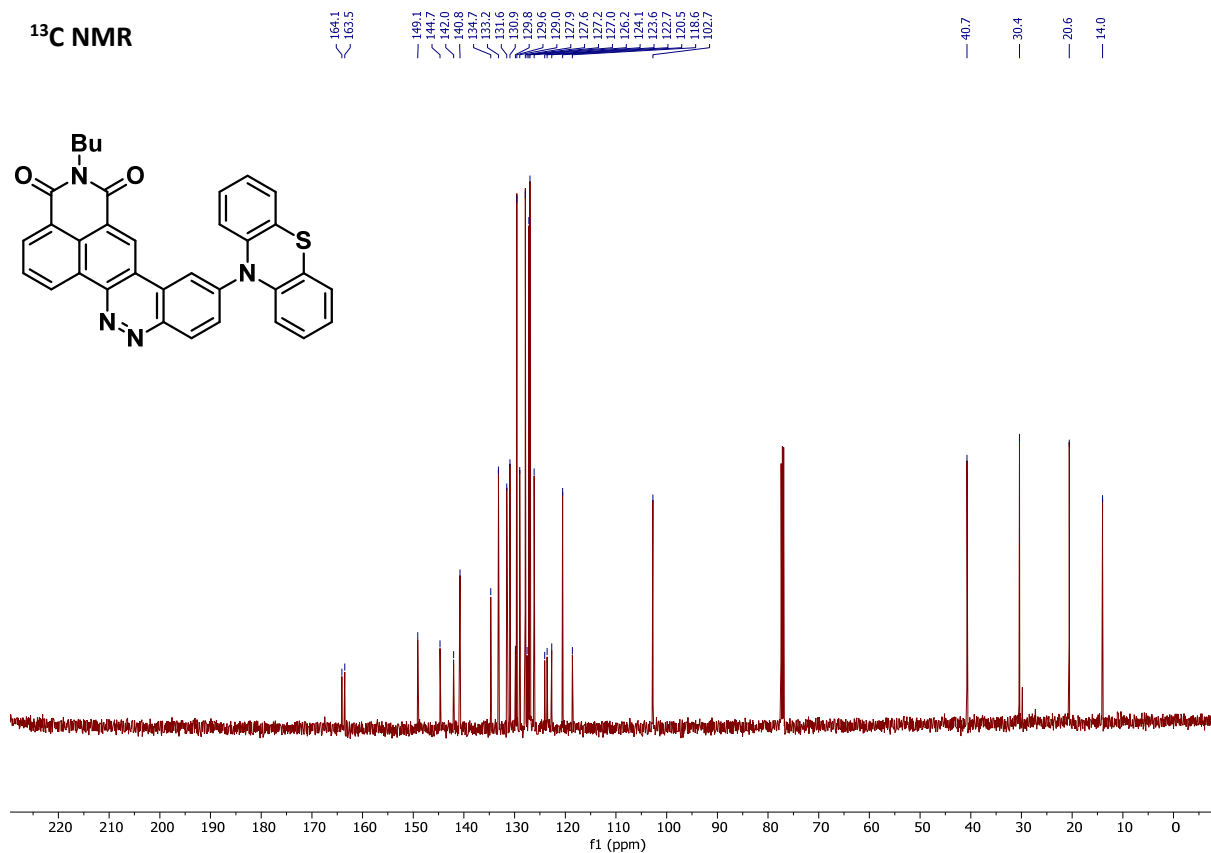

# HRMS

05-Aug-2022 8:7:2  
1: TQFMS ES+

LCTPremier

EQ75\_take19-324 (0.627)

9.35e+002

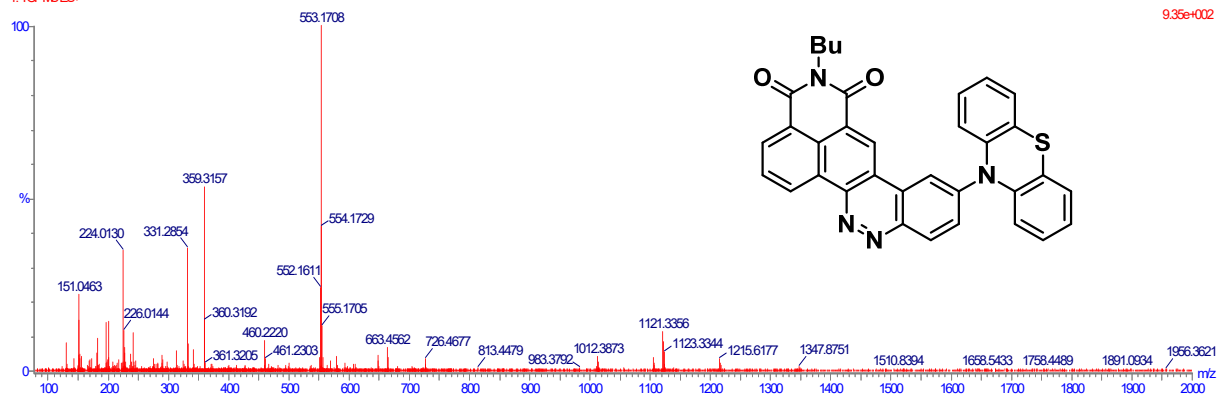

## Compound 2e:

<sup>1</sup>H NMR

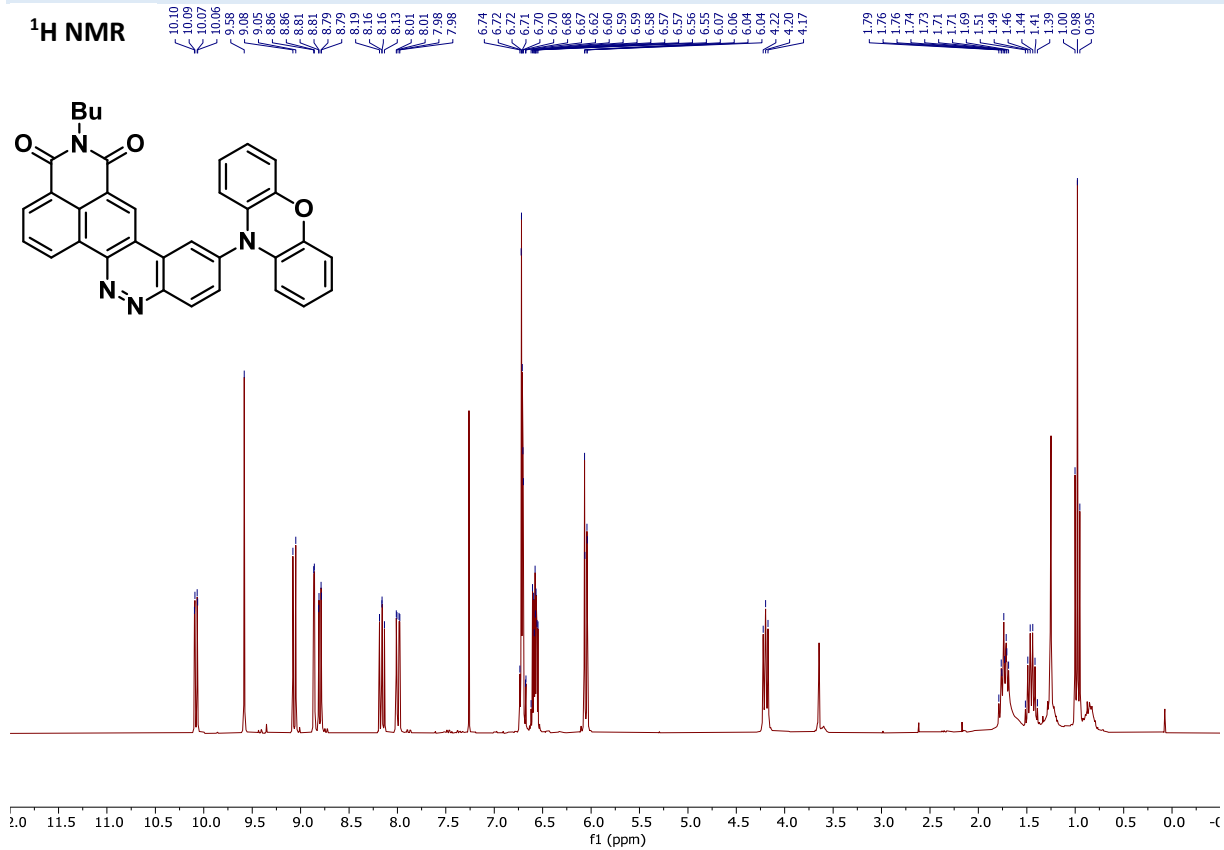

<sup>13</sup>C NMR

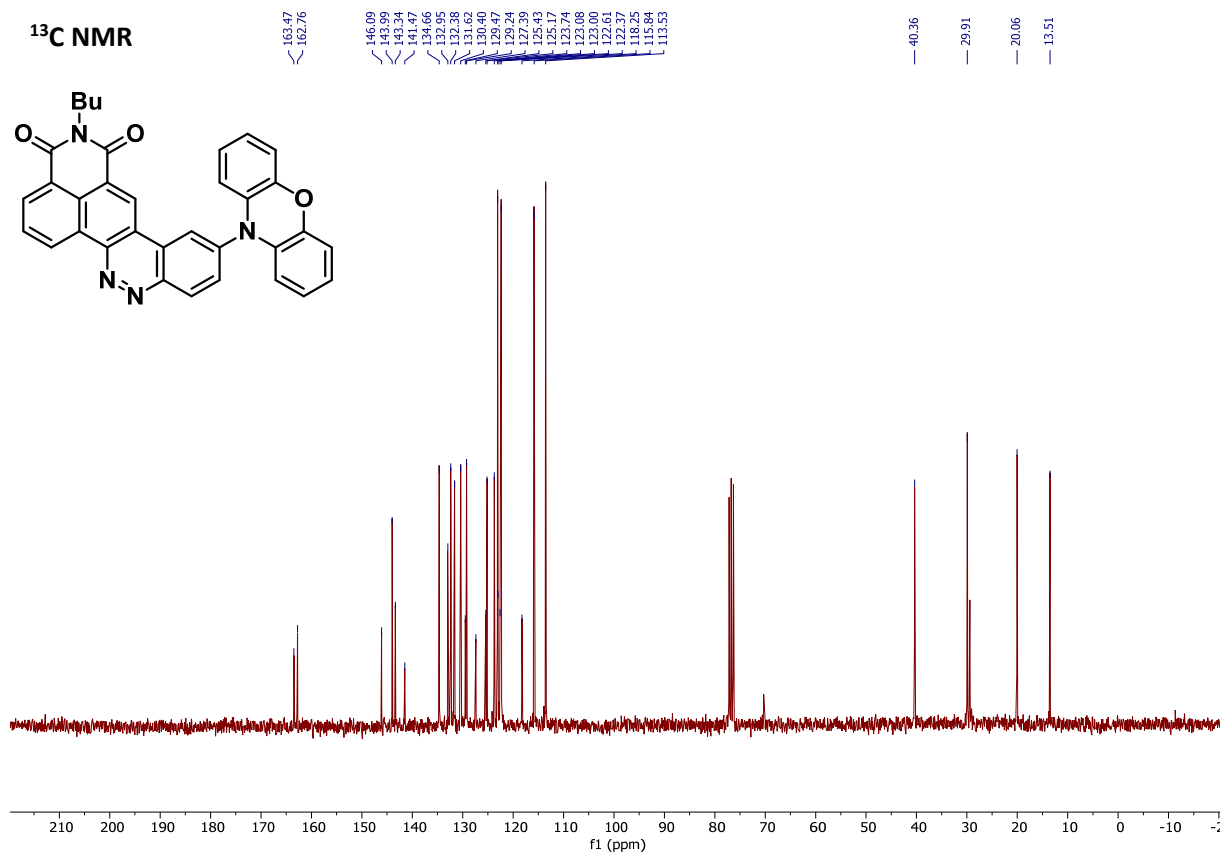

# HRMS

05-Aug-2022 6:2:1  
1: TCFMSES+

LCTPremier

EQ75\_take18-524 (0.626)

2.40e+003

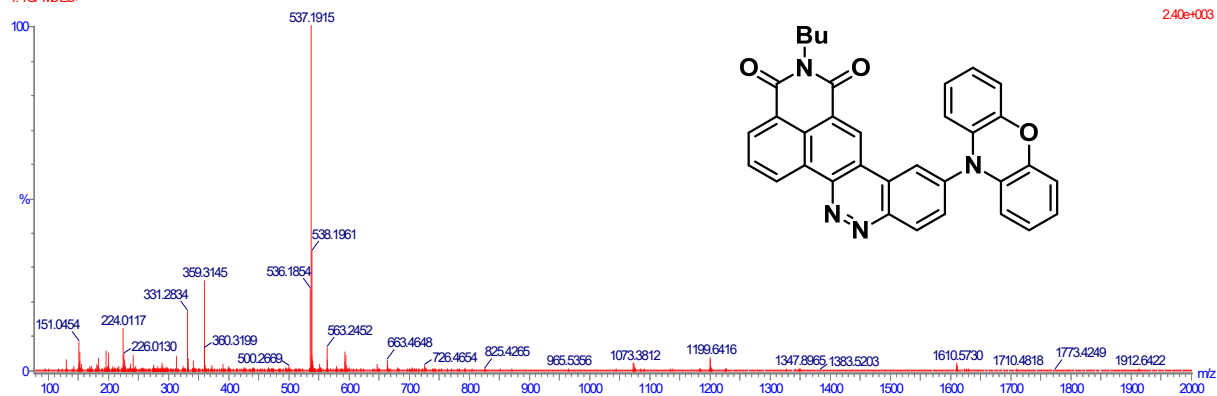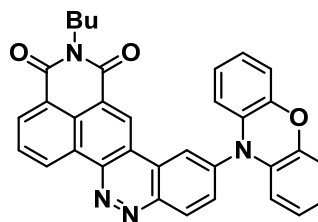

# Compound 2f:

## <sup>1</sup>H NMR

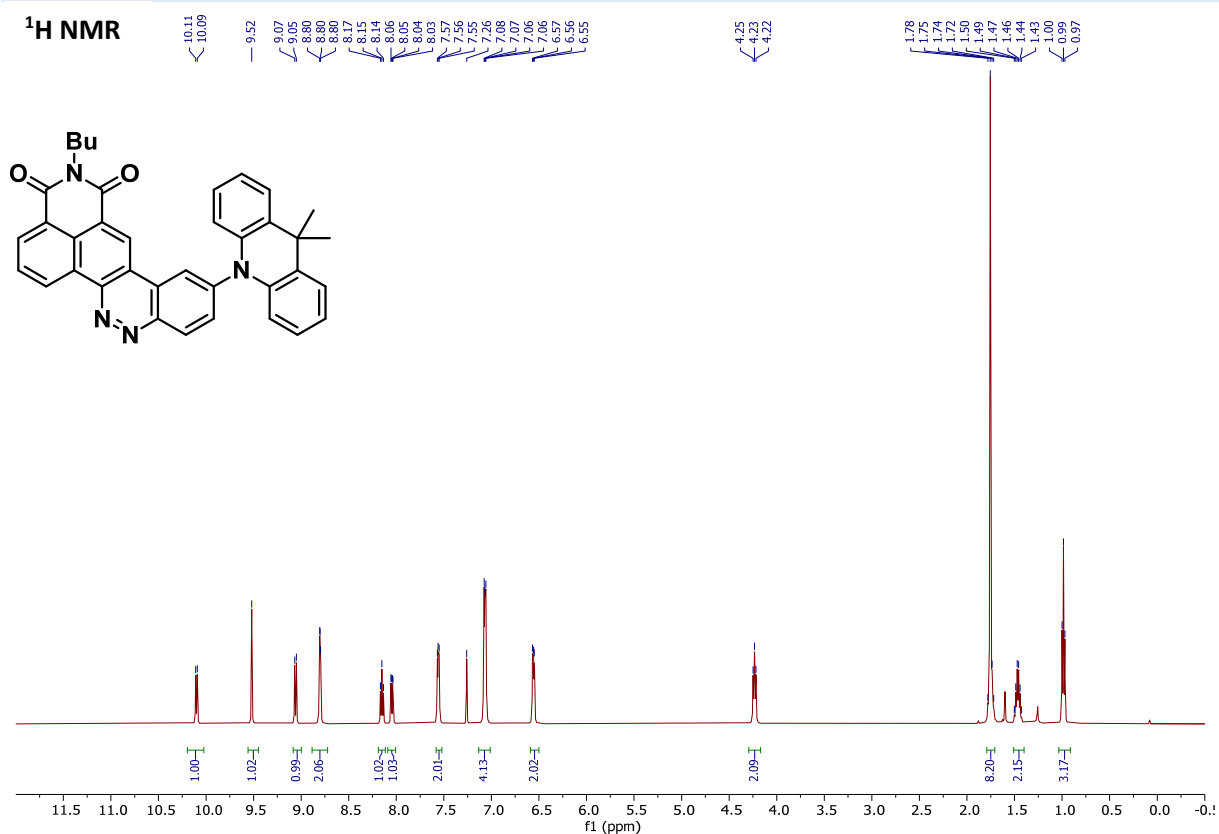

## <sup>13</sup>C NMR

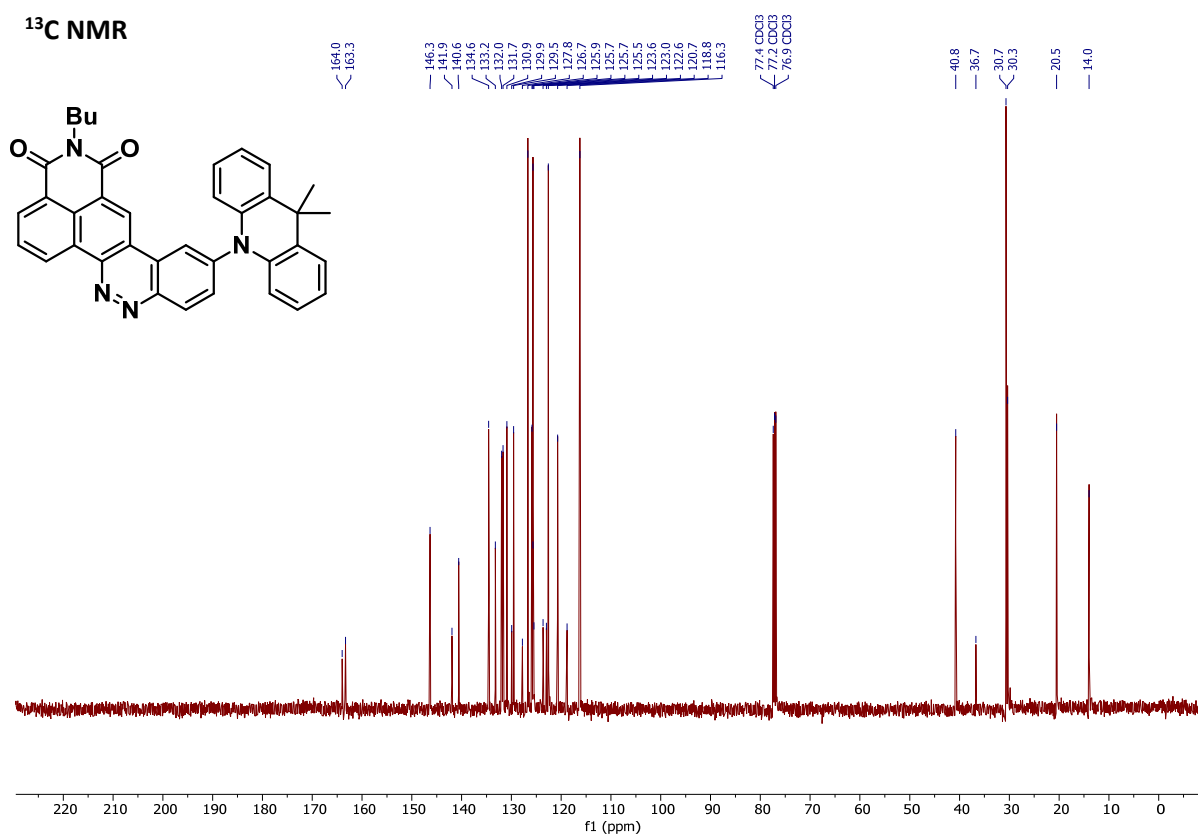



# HRMS

05-Aug-2022 6:5:1  
1: TCFMSES+

LCTPremier

EQ75\_take18-4-24 (0.626)

4.42e+003

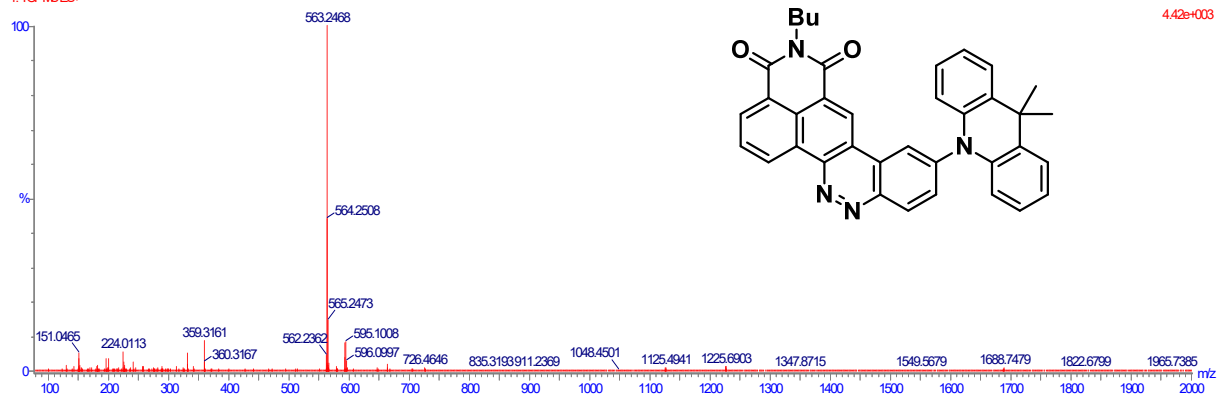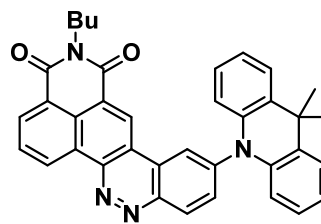

# Compound 3a

## <sup>1</sup>H RMN

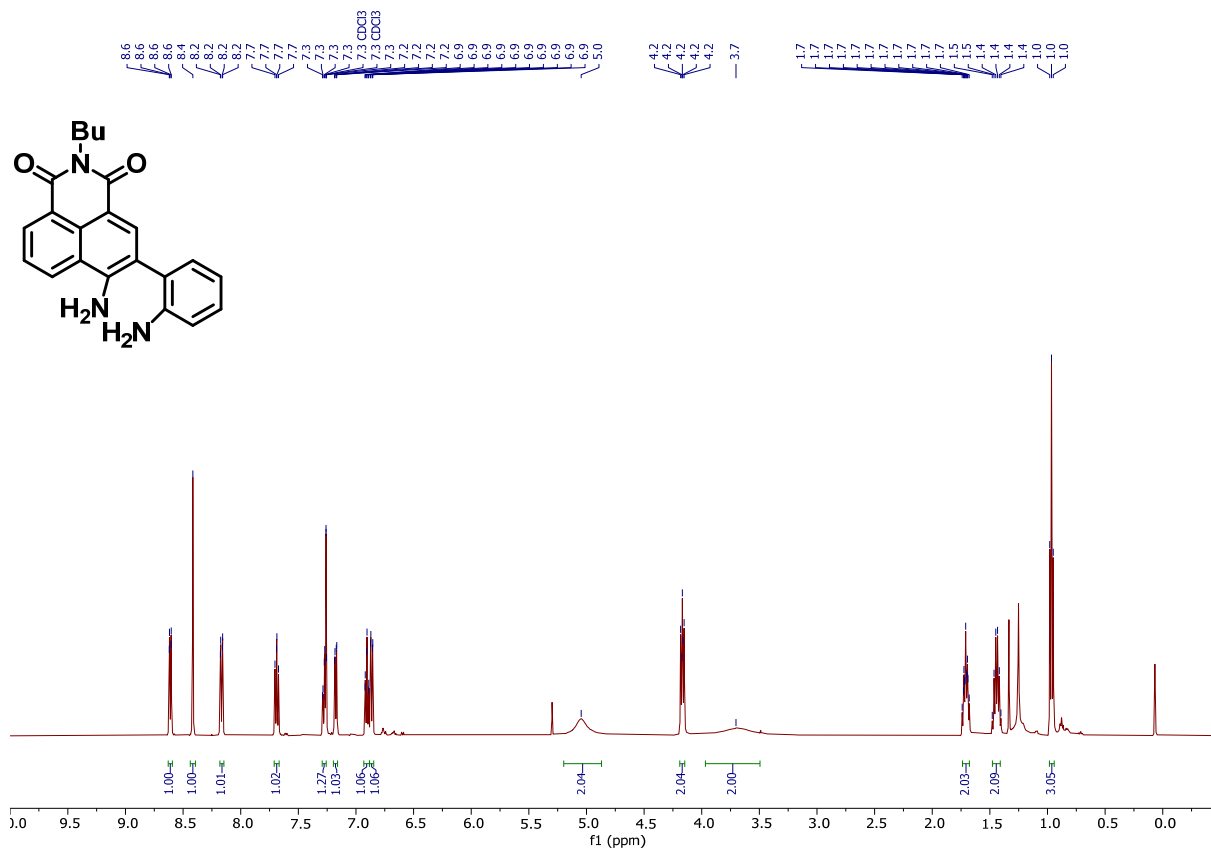

## <sup>13</sup>C RMN

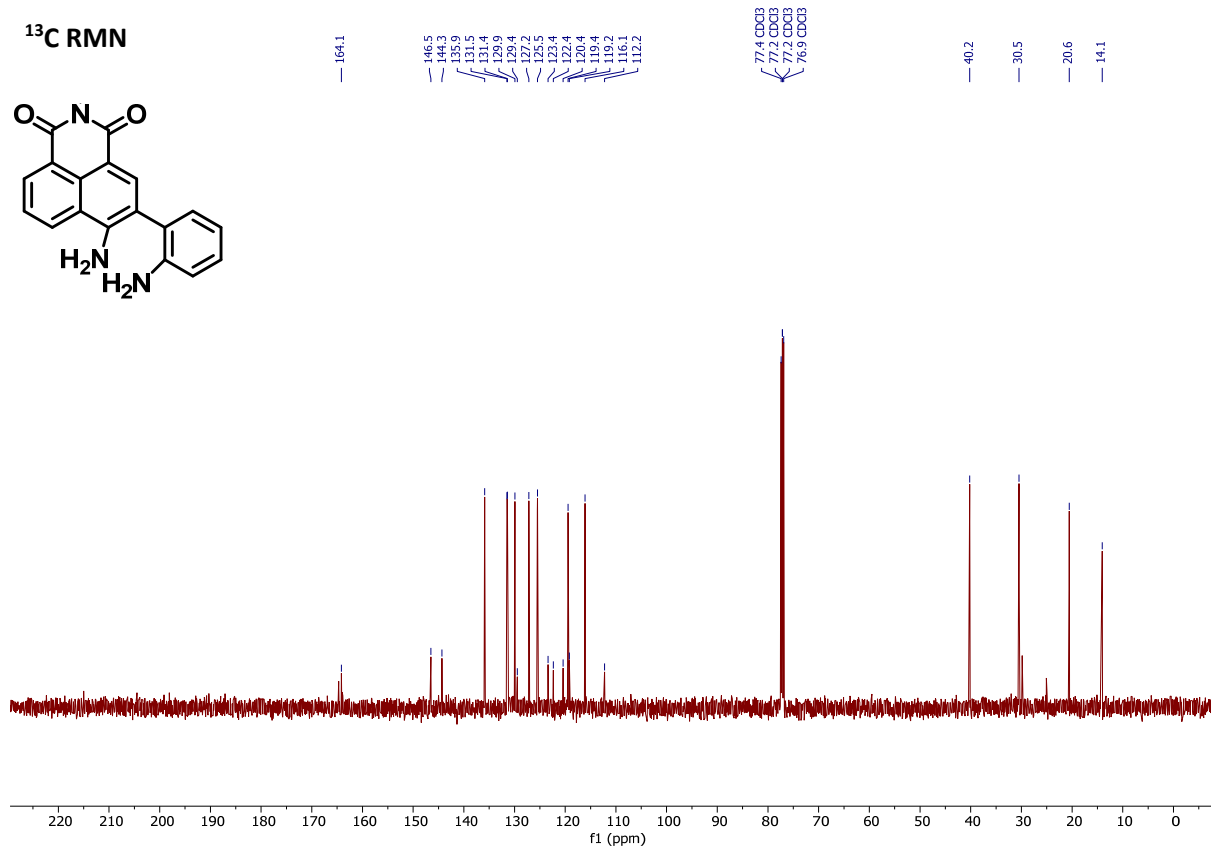

# HRMS

31-Jan-2024 10:05:42  
1.TCFMSES+

LCT Premier

EQ75\_take42-131 (0.790)

2.67e+003

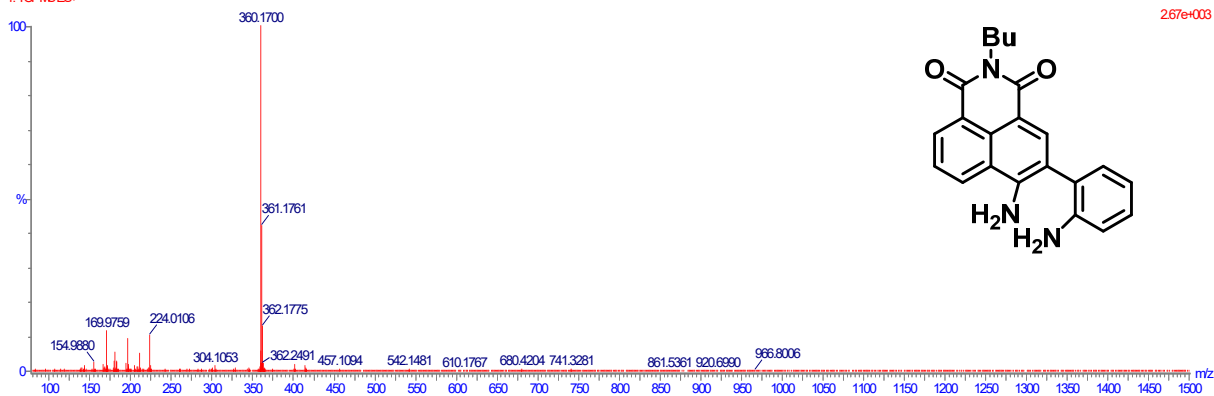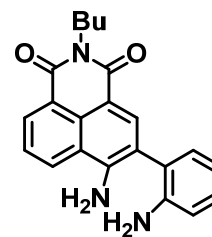

**Compound 3:**

<sup>1</sup>H RMN

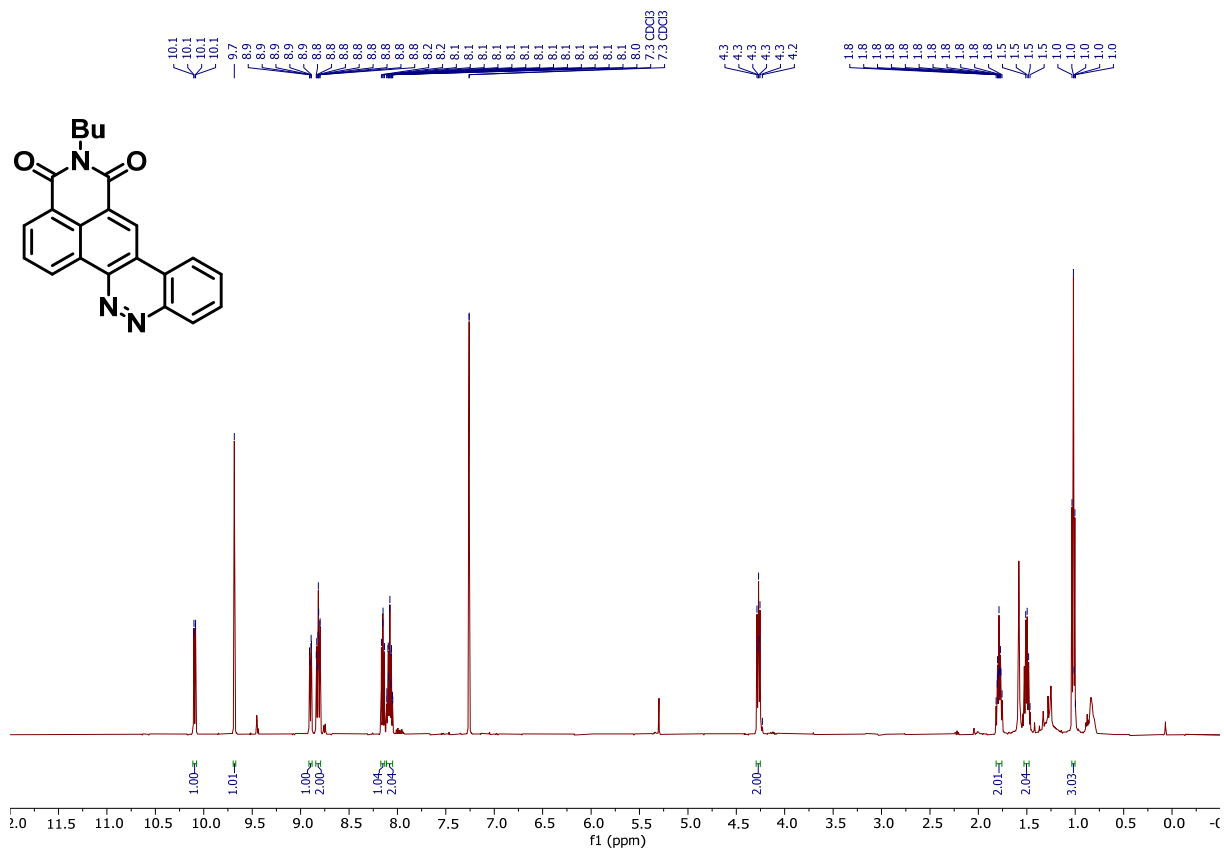

### <sup>13</sup>C RMN

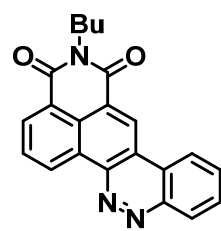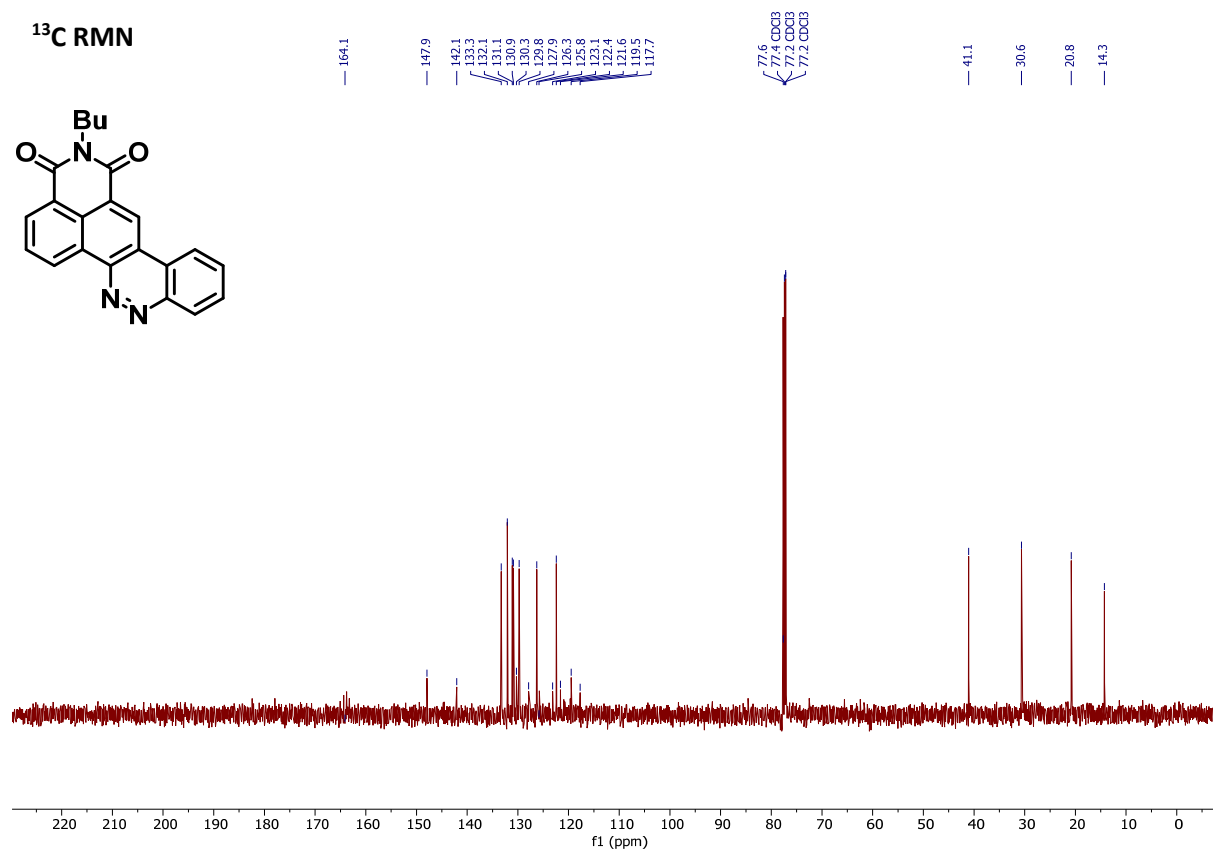

### HRMS

31-Jan-2024 10:09:52  
1: TQFMS ES+

LCT Premier

EQ75\_take42-2-25 (0.664)

6.42e+003

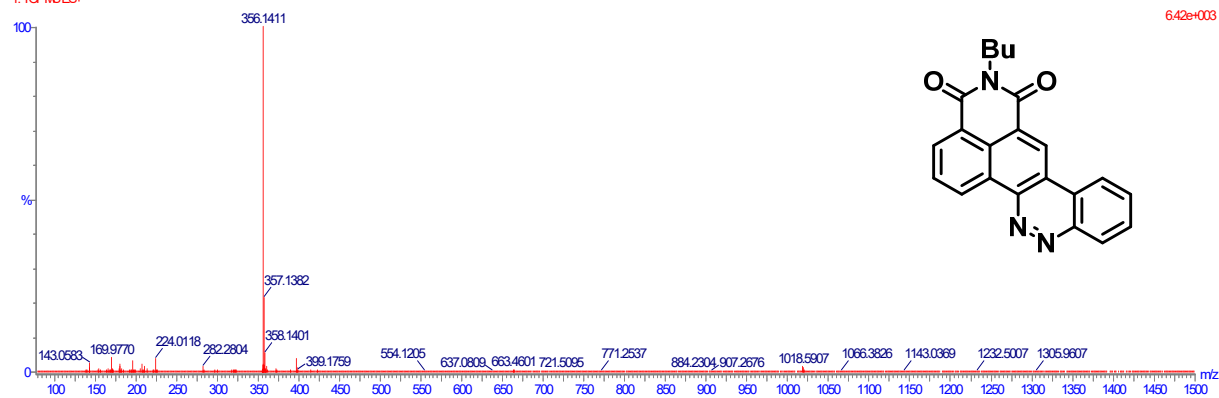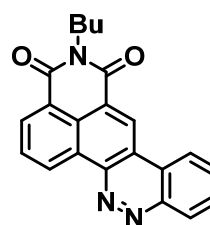

## Theoretical calculations:

The ground state geometry of compound **2b'** (for the sake of simplification, the ethyl group was substituted by a methyl) was initially optimized using the B3LYP-D3(BJ)/6-311G(d,p) level of calculation, followed by a frequency calculation to verify convergence to a local minimum. Subsequently, TD-DFT calculations were conducted at the PBE1PBE/6-311G(d,p) level of theory, incorporating an IEF-PCM solvation model for CHCl<sub>3</sub>. The absorption energies and oscillator strengths of the first 24 vertical excitations were computed and utilized to simulate the UV spectra (as depicted below). As anticipated:

- 1) The frontier orbital distributions for **2b'** tend to affirm the charge transfer character of the first excited state, with the HOMO coefficients situated on the electron-donor moiety (in this case, the carbazole), while the LUMO coefficients are primarily located on the naphthalimide substructure.
- 2) The first excitation predominantly entails a HOMO–LUMO  $\pi$ – $\pi^*$  transition, contributing 99% to the overall process.

### Cartesian coordinates of the optimized geometrie of **2b'** (in Å):

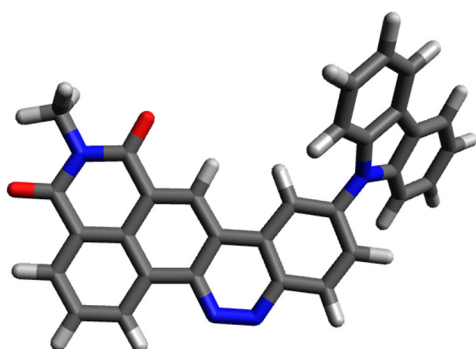

|   |         |          |          |
|---|---------|----------|----------|
| C | 6.40147 | -0.86900 | 0.03138  |
| C | 6.05311 | -2.19516 | -0.26352 |
| C | 4.72840 | -2.56500 | -0.38977 |
| C | 3.70410 | -1.61047 | -0.22247 |
| C | 4.05705 | -0.27092 | 0.07490  |
| C | 5.41527 | 0.08716  | 0.19928  |
| C | 2.30695 | -1.94323 | -0.34228 |
| C | 1.32314 | -0.95281 | -0.16085 |
| C | 1.71666 | 0.37959  | 0.13241  |

|   |          |          |          |
|---|----------|----------|----------|
| C | 3.03917  | 0.71054  | 0.24584  |
| N | 2.00768  | -3.25170 | -0.63966 |
| N | 0.78661  | -3.63578 | -0.76484 |
| C | -0.24330 | -2.74192 | -0.59929 |
| C | -0.04072 | -1.37272 | -0.29372 |
| C | -1.55608 | -3.24177 | -0.75110 |
| C | -2.63483 | -2.40888 | -0.60683 |
| C | -2.43798 | -1.04175 | -0.28559 |
| C | -1.16020 | -0.53679 | -0.12658 |
| C | 3.40123  | 2.11895  | 0.55077  |
| N | 4.76091  | 2.41000  | 0.66542  |
| C | 5.80678  | 1.48333  | 0.50946  |
| O | 6.96776  | 1.82355  | 0.62493  |
| O | 2.56685  | 2.99236  | 0.69769  |
| C | 5.10168  | 3.80414  | 0.97055  |
| N | -3.55496 | -0.19779 | -0.14700 |
| C | -3.71283 | 1.06183  | -0.74784 |
| C | -4.97343 | 1.58610  | -0.37429 |
| C | -5.60086 | 0.60949  | 0.49158  |
| C | -4.70150 | -0.47683 | 0.61258  |
| C | -6.81546 | 0.57839  | 1.17833  |
| C | -7.11263 | -0.51996 | 1.97573  |
| C | -6.20109 | -1.57705 | 2.10255  |
| C | -4.98310 | -1.56972 | 1.42999  |
| C | -2.86856 | 1.74525  | -1.62048 |
| C | -3.29439 | 2.98084  | -2.09739 |
| C | -4.53142 | 3.52268  | -1.72248 |
| C | -5.37725 | 2.82805  | -0.86691 |
| H | 7.43589  | -0.56713 | 0.13276  |
| H | 6.83300  | -2.93556 | -0.39335 |
| H | 4.44557  | -3.58351 | -0.61723 |

|   |          |          |          |
|---|----------|----------|----------|
| H | 0.98499  | 1.16433  | 0.27077  |
| H | -1.66904 | -4.28877 | -1.00185 |
| H | -3.64222 | -2.77341 | -0.75611 |
| H | -1.03679 | 0.50130  | 0.14678  |
| H | 4.72077  | 4.45620  | 0.18439  |
| H | 4.63943  | 4.09677  | 1.91328  |
| H | 6.18240  | 3.87324  | 1.03520  |
| H | -7.51268 | 1.40390  | 1.09514  |
| H | -8.05229 | -0.55794 | 2.51323  |
| H | -6.44394 | -2.41699 | 2.74249  |
| H | -4.27900 | -2.38159 | 1.55324  |
| H | -1.91777 | 1.33218  | -1.92890 |
| H | -2.65313 | 3.53274  | -2.77420 |
| H | -4.83017 | 4.48927  | -2.10939 |
| H | -6.33987 | 3.24067  | -0.58829 |

### FMOs distributions for 2b'

Isosurfaces (isovalue 0.02) of HOMO (left) and LUMO (right) calculated for compound 2b'.

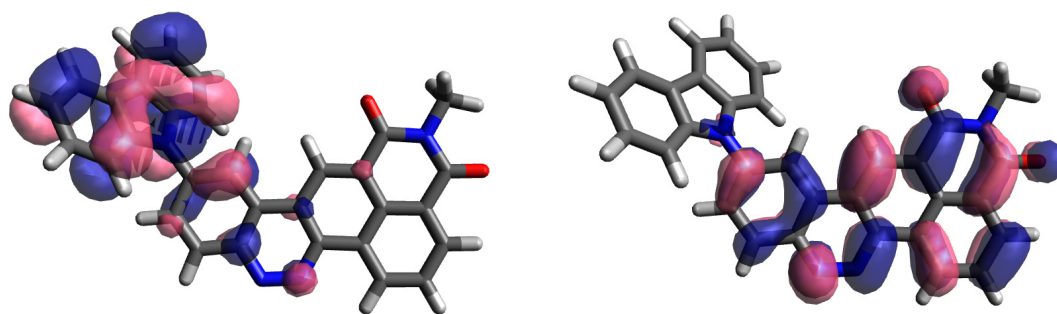

### Simulated UV data (excitation number, energy, wavelength, oscillator strengths and transition involved)

| No. | Energy (cm <sup>-1</sup> ) | Wavelength (nm) | Osc. Strength | Major contribs                   |
|-----|----------------------------|-----------------|---------------|----------------------------------|
| 1   | 20891.37282                | 478.666485261   | 0.1707        | HOMO->LUMO (99%)                 |
| 2   | 21791.4875627              | 458.894785003   | 0.0013        | H-2->LUMO (89%)                  |
| 3   | 24042.5809741              | 415.92872291    | 0.0001        | H-1->LUMO (99%)                  |
| 4   | 27386.5556367              | 365.142668273   | 0.1027        | H-3->LUMO (59%), HOMO->L+1 (23%) |
| 5   | 28717.3704445              | 348.221297605   | 0.1376        | H-3->LUMO (13%), HOMO->L+1 (71%) |



|    |               |               |        |                                                                     |
|----|---------------|---------------|--------|---------------------------------------------------------------------|
| 6  | 29060.9626313 | 344.104224174 | 0.1226 | H-4->LUMO (39%), H-3->LUMO (22%), HOMO->L+2 (29%)                   |
| 7  | 29941.7200678 | 333.982148566 | 0.0377 | H-4->LUMO (36%), HOMO->L+2 (55%)                                    |
| 8  | 29988.5002246 | 333.461157613 | 0.0004 | H-6->LUMO (18%), H-2->L+1 (69%)                                     |
| 9  | 30161.9094269 | 331.543996717 | 0.0005 | H-6->LUMO (69%), H-2->L+1 (17%)                                     |
| 10 | 31594.3500928 | 316.512286869 | 0.0001 | H-1->L+1 (96%)                                                      |
| 11 | 32766.2736781 | 305.191859722 | 0.0005 | H-5->LUMO (93%)                                                     |
| 12 | 33083.2495687 | 302.267767839 | 0.0091 | H-7->LUMO (85%)                                                     |
| 13 | 33172.7771103 | 301.451999835 | 0.001  | H-1->L+2 (94%)                                                      |
| 14 | 33299.4061557 | 300.3056557   | 0.0562 | HOMO->L+3 (89%)                                                     |
| 15 | 33841.410732  | 295.495955508 | 0.0002 | H-2->L+2 (86%)                                                      |
| 16 | 34218.0716503 | 292.243236328 | 0.0    | H-10->LUMO (75%)                                                    |
| 17 | 34804.4367202 | 287.319690889 | 0.0306 | H-8->LUMO (62%), H-3->L+1 (23%)                                     |
| 18 | 35346.4412965 | 282.913912496 | 0.0543 | H-8->LUMO (22%), H-3->L+1 (50%)                                     |
| 19 | 36204.615209  | 276.207879639 | 0.0359 | H-4->L+1 (61%)                                                      |
| 20 | 37240.2310958 | 268.526797653 | 0.2918 | H-3->L+2 (11%), HOMO->L+4 (72%)                                     |
| 21 | 37295.8833514 | 268.126106728 | 0.1648 | H-1->L+3 (69%), HOMO->L+6 (18%)                                     |
| 22 | 38245.1979143 | 261.470734768 | 0.5088 | H-9->LUMO (19%), H-4->L+1 (16%), H-3->L+2 (33%),<br>HOMO->L+4 (11%) |
| 23 | 38651.7013465 | 258.720823447 | 0.1207 | H-11->LUMO (11%), H-9->LUMO (52%), H-3->L+2 (20%)                   |
| 24 | 39555.8488614 | 252.80711419  | 0.0103 | H-11->LUMO (54%), H-9->LUMO (27%)                                   |

## Simulated UV spectra of 2b'

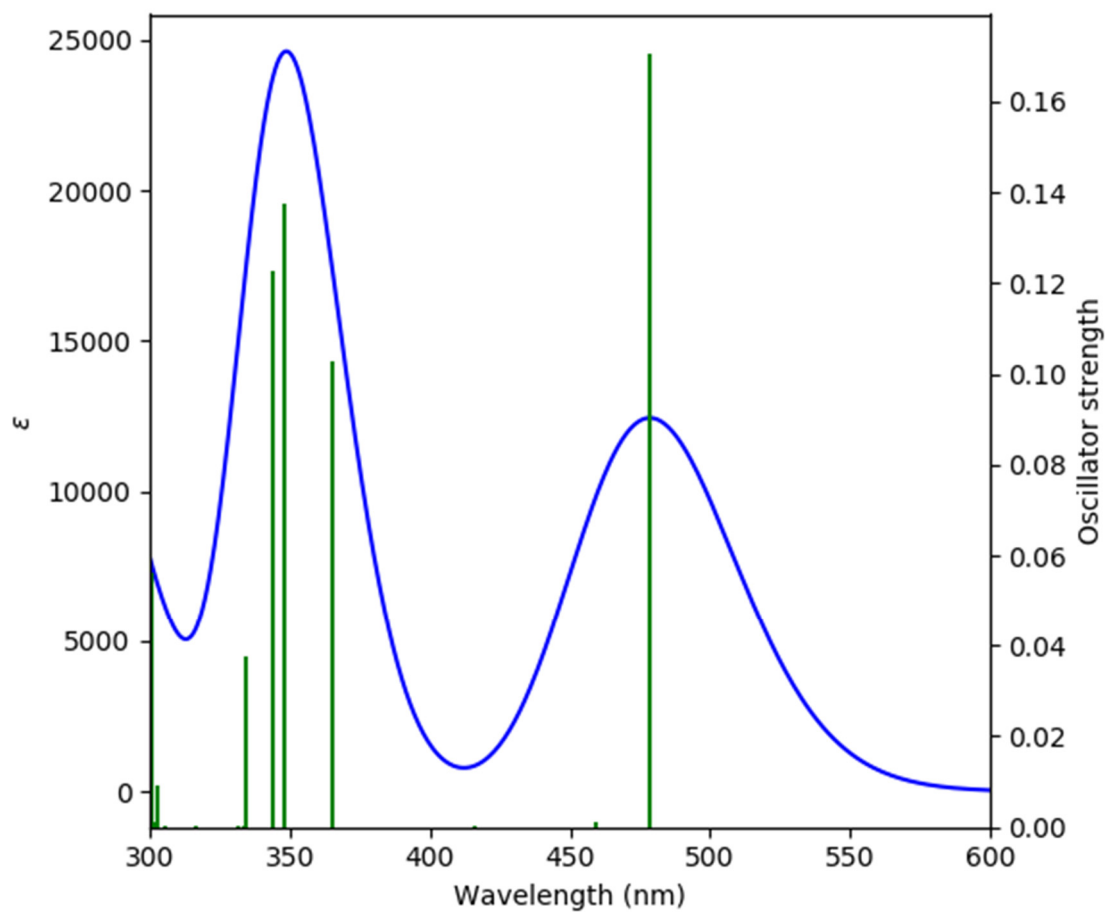

1. E. Tacke, M.-D. Hoang, K. Tatoueix, B. Keromnes, E. Van Eslande, P. Durand, G. Pieters and A. Chevalier, *Chem. Sci.*, 2023, **14**, 6000-6010.
2. G. R. Fulmer, A. J. M. Miller, N. H. Sherden, H. E. Gottlieb, A. Nudelman, B. M. Stoltz, J. E. Bercaw and K. I. Goldberg, *Organometallics*, 2010, **29**, 2176-2179.
